# Supplementary material for: Evaluating and Improving Engagement in Care After High-Intensity Stays for Mental or Substance Use Disorders
Source: Atypon-hosted journal article supplement (doi:10.1176/appi.ps.202000287), 2021-06-09
Supplement: appi.ps.202000287.ds001.pdf [file appi.ps.202000287.ds001.pdf]

**Evaluating and Improving Engagement in Care after High-Intensity Stays for Mental Health or Substance Use Disorders**

**Contents**

**Post-discharge Engagement Patient Tracking and Population Management Tool..... 2**

**Summary of PDE Patient Tracking Tool ..... 2**

**Detailed Definitions and Features of PDE Patient Tracking Tool..... 3**

**Data on Use of PDE Patient Tracking Tool Since Launch..... 8**

**Detailed Specifications of the Post-Discharge Engagement Quality Measure..... 9**

## Post-discharge Engagement Population Management Tool

This section contains a series of figures. The first figure summarizes all data elements displayed in the population management tool. Subsequently, a series of figures presents detailed definitions and user functions from a User Guide for the population management tool. Finally, we provide a brief analysis on use of the PDE population management tool.

### Summary of PDE Population Management Tool

**Figure.** Summary of Data Elements in Post Discharge Engagement (PDE) Patient Tracking and Population Management Tool

| Section                            | Information Included in Section                                                                                                                                                                                                                                                                                                                          |
|------------------------------------|----------------------------------------------------------------------------------------------------------------------------------------------------------------------------------------------------------------------------------------------------------------------------------------------------------------------------------------------------------|
| Patient                            | Name<br>Phone numbers                                                                                                                                                                                                                                                                                                                                    |
| Suicide Risk                       | REACH VET (a predictive modeling initiative) <sup>a</sup><br>Patient Record Flag - High Risk for Suicide                                                                                                                                                                                                                                                 |
| Stay Information                   | Admit Date<br>Discharge Date<br>Discharge Health Care System<br>Last Treating Specialty of Stay (e.g. MH Acute Psychiatry, SUD Residential Rehabilitation Treatment Program)<br>Relevant Admit and/or Discharge Diagnoses<br>If discharge was Against Medical Advice                                                                                     |
| Follow Up Post Discharge           | Number of Qualifying Follow Up MH or SUD Visits<br>Last 5 visit days <ul style="list-style-type: none"> <li>• Name of Provider</li> <li>• Visit Clinic/Stop code</li> </ul> Date of first visit<br>Date of most recent visit<br>Date of next upcoming appointment                                                                                        |
| Patient's Care Team and Facilities | Health Care System Responsible for Coordinating Treatment (per information updated quarterly, and monthly, if the responsible health care system has changed recently)<br>Most Recently Assigned Providers or Care Coordinators <ul style="list-style-type: none"> <li>• Mental Health Treatment Coordinator</li> <li>• Primary Care Provider</li> </ul> |

|                                                                                                                                                     |                                                                                                                                                                                                                         |
|-----------------------------------------------------------------------------------------------------------------------------------------------------|-------------------------------------------------------------------------------------------------------------------------------------------------------------------------------------------------------------------------|
| Data Filters available to facilitate targeted aspects of care coordination (e.g., discharge planning vs. rescheduling appointments after discharge) | Health Care System Role (e.g. Discharge Health Care System, Responsibility for Care Coordination)<br>Last Treating Clinical Specialty Type<br>Discharge Status<br>PDE Metric Discharge Group<br>PDE1 Target Met/Not Met |
|-----------------------------------------------------------------------------------------------------------------------------------------------------|-------------------------------------------------------------------------------------------------------------------------------------------------------------------------------------------------------------------------|

<sup>a</sup> The Recovery Engagement and Coordination for Health – Veterans Enhanced Treatment (REACH VET) initiative at VA uses predictive modeling and outreach as a suicide prevention strategy. See for more information: <https://www.va.gov/opa/pressrel/pressrelease.cfm?id=2878>

## Detailed Definitions and Features of PDE Population Management Tool

The following series of figures come from a User Guide for the PDE population management (i.e., referred to as “patient tracker” tool in some materials).

# Post-Discharge Engagement (PDE) Patient Tracking Report

*Updated: August, 2019*

## Tool Tips!

TIP: let your mouse cursor hover over marked or highlighted cells in the report to reveal additional info

The first screenshot shows a table with columns 'Suicide Risk' and 'Stay Information'. A red arrow points to a red diamond icon in the 'Patient Record Flag' column, with a tooltip that reads: 'REACH VET Patient Current Top 0.1% Risk Click to view REACH VET detail report'.

The second screenshot shows a table with a yellow cell containing '0'. A red arrow points to it, with a tooltip that reads: '3 more visits needed by 11/18/2017'.

The third screenshot shows a table with a yellow cell containing '1'. A red arrow points to it, with a tooltip that reads: '10/19/2017 10/'.

## Patient Tracking Report - Basics

Click on red arrows to view details.

The screenshot shows the VA Post Discharge Patient Tracking Report interface. A search box is highlighted with a red arrow and text: "Type a name in this box to search the entire report for a patient." A red arrow points to a search icon. A red arrow points to a sort icon with text: "Click on this symbol (up/down arrow) to sort by that column". A red arrow points to a parameter menu with text: "Click here to hide the Parameter Menu". A red arrow points to a filter button with text: "Change the options using the drop down menus, then click Apply to view the report with your changes." The main table displays patient information including Patient Name, Last4, REACH Vet, Patient Record Flag, Admit Date, AMA, Discharge Date, Discharge Facility, # of MH Visits Since Discharge, and First Follow Up MH Visit.

# Report Parameters

**Parameters**

VISN: 21

Facility: (5V21) (640) Palo Alto

Discharge Group: High Risk for Suicide, MH Inpatient

Discharge Status: Currently Inpatient, Discharged

Apply

**VA Post Discharge Engagement Patient Tracking Report**

Facilities: Discharge facility is not the same as the facility chosen in the report parameters. This facility is not the same as the discharge facility.

Mental Health Encounters: Target for visits has been met within timeframe according to metric risk. Needs Attention. Target for visits has NOT yet been met.

| Patient               | REACH Vet | Patient Record Flag | Admit Date | AMA | Discharge Date | Discharge Facility | # of MH Visits Since Discharge | First Follow Up MH Vis |
|-----------------------|-----------|---------------------|------------|-----|----------------|--------------------|--------------------------------|------------------------|
| High Risk for Suicide |           |                     | 10/2/2017  |     | 10/18/2017     | Palo Alto, CA HCS  | 1                              | 10/17/2017             |
|                       |           |                     | 9/25/2017  |     | 10/13/2017     | Palo Alto, CA HCS  | 1                              | 10/17/2017             |
|                       |           |                     | 10/6/2017  |     | 10/12/2017     | Palo Alto, CA HCS  | 1                              | 10/19/2017             |
|                       |           |                     | 9/27/2017  |     | 10/12/2017     | Palo Alto, CA HCS  | 2                              | 10/14/2017             |
|                       |           |                     | 9/20/2017  |     | 10/11/2017     | Palo Alto, CA HCS  | 1                              | 10/16/2017             |
|                       |           |                     | 9/21/2017  |     | 10/11/2017     | Palo Alto, CA HCS  | 1                              | 10/16/2017             |

**VISN and Facility default to your facility. If you have access to patient information at other sites then you can change these options to see another facility's list.**

# Parameters, cont.

**Filter By**

| Filter By        | Options                                                                                                                                                                                               | Details                                                                                                                                                                                 |
|------------------|-------------------------------------------------------------------------------------------------------------------------------------------------------------------------------------------------------|-----------------------------------------------------------------------------------------------------------------------------------------------------------------------------------------|
| Facility Role    | <ul style="list-style-type: none"> <li>Discharge Facility</li> <li>Current MH Treatment Facility</li> <li>Quarterly MH Treatment Facility</li> </ul>                                                  | <ul style="list-style-type: none"> <li>Default is ALL</li> <li>Current facility is updated monthly.</li> <li>Quarterly facility is updated at the beginning of each quarter.</li> </ul> |
| Discharge Group  | <ul style="list-style-type: none"> <li>High Risk for Suicide (Group 3)</li> <li>Inpatient MH (Group 2)</li> <li>MH Diagnosis in non-MH setting (Group 1)</li> <li>MH Residential (Group 1)</li> </ul> | <ul style="list-style-type: none"> <li>Default is ALL</li> <li>Filter in parameters OR collapse and expand groups using the (+) beside the group heading</li> </ul>                     |
| Discharge Status | <ul style="list-style-type: none"> <li>Currently Inpatient</li> <li>Discharged</li> </ul>                                                                                                             | <ul style="list-style-type: none"> <li>Default is ALL</li> <li>Change selection based on your preference to see patients already discharged, currently admitted, or both.</li> </ul>    |

**Parameters**

VISN: 21

Facility: (5V21) (640) Palo Alto, CA

Facility Role: Discharge Facility, Current MH Treatment Facility

Discharge Group: High Risk for Suicide, MH Inpatient

Discharge Status: Currently Inpatient, Discharged

Apply

**VA Post Discharge Engagement Patient Tracking Report**

Facilities: Discharge facility is not the same as the facility chosen in the report parameters. This facility is not the same as the discharge facility.

Mental Health Encounters: Target for visits has been met within timeframe according to metric risk. Needs Attention. Target for visits has NOT yet been met.

# Groups

| Patient                                     | REACH Vet | Patient Record Flag | Admit Date | AMA       | Discharge Date |
|---------------------------------------------|-----------|---------------------|------------|-----------|----------------|
| <b>High Risk for Suicide</b> (Group Header) |           |                     |            |           |                |
|                                             |           | ◆                   | 10/2/2017  |           | 10/18/2017     |
| <b>MH Residential Program</b>               |           |                     |            |           |                |
|                                             |           |                     |            | 9/21/2017 |                |
|                                             |           |                     |            | 9/20/2017 |                |

The report is divided by groups, based on how many follow-up visits are required per PDE1 metric (see Slide 3)

Groups can be collapsed and expanded using the + - box next to the header.

Groups can also be filtered from the report in the parameter section (see Slide 4)

# Patient Information & Suicide Risk

| Patient                                                              | REACH Vet | Patient Record Flag | Admit Date | AMA | Discharge Date | Follow Up                                                                                                                                                  |
|----------------------------------------------------------------------|-----------|---------------------|------------|-----|----------------|------------------------------------------------------------------------------------------------------------------------------------------------------------|
| <b>High Risk for Suicide</b>                                         |           |                     |            |     |                |                                                                                                                                                            |
| <b>Patient, Sample</b> 1234<br>Phone: [REDACTED]<br>Cell: [REDACTED] |           | ◆                   | 10/12/2017 |     | 10/16/2017     | Last Treating Specialty: SURGICAL ICU<br>Principal Diagnosis: ANEURYSM OF ARTERY OF LOWER EXTREMITY (72.4)<br>Clinic: MENTAL HEALTH<br>Provider: MENDELSON |

To view contact information for a patient or more information in the other sections, click the + - box next to the patient's name to expand details.

| Patient                               | REACH Vet | Patient Record Flag |
|---------------------------------------|-----------|---------------------|
| <b>High Risk for Suicide</b>          |           |                     |
|                                       | ▲         | ◆                   |
| <b>Patient, Sample</b> 1234           | ▲         | ◆                   |
| Phone: [REDACTED]<br>Cell: [REDACTED] |           |                     |

## REACH Vet

This column indicates whether a patient is part of REACH Vet.  
 A **red triangle** indicates this patient is in the top 0.1% risk group for the facility in the current month.  
 A **yellow triangle** indicates he/she was in the top 0.1% in the past.  
 Click on the triangle to go to the patient's REACH Vet report.

## Patient Record Flag

This column indicates whether a patient has/had an active Patient Record Flag for High Risk of Suicide.  
 A **red diamond** indicates the flag is currently active.  
 The **light orange diamond** indicates the flag was active at the time of discharge, but has since been discontinued.

## Stay Information

This section provides information about the inpatient or residential stay.

| Stay Information                                                                                            |     |                |                    |
|-------------------------------------------------------------------------------------------------------------|-----|----------------|--------------------|
| Admit Date                                                                                                  | AMA | Discharge Date | Discharge Facility |
| 10/2/2017                                                                                                   |     | 10/18/2017     | Palo Alto, CA HCS  |
| 10/12/2017                                                                                                  |     | 10/16/2017     | Palo Alto, CA HCS  |
| Last Treating Specialty: SURGICAL ICU<br>Principal Diagnosis: ANEURYSM OF ARTERY OF LOWER EXTREMITY (I72.4) |     |                |                    |

Expand the patient details (see Slide 9) to view the details in the light gray box:

- Last Treating Specialty
- Principal Diagnosis or Admit Diagnosis

### Admit Date

Displays the initial admission date.

### AMA

A **red circle** indicates this patient had an irregular discharge and left against medical advice.

### Discharge Date

Displays the discharge date or, if the patient is currently in a residential or inpatient stay, "Not Yet Discharged" will appear in this column.

### Discharge Facility

The facility from which the patient has been or will be discharged.

If this facility is *not* the facility chosen in the report parameters (i.e., your facility), the cell will be filled gray to highlight the difference.

## Follow Up

This section provides information about the follow up mental health visits after discharge.

| Follow Up Post Discharge          |                          |                      |                         |
|-----------------------------------|--------------------------|----------------------|-------------------------|
| # of Qualifying MH Visits         | First Follow-Up MH Visit | Most Recent MH Visit | Upcoming MH Appointment |
| 2                                 | 10/16/2017               | 10/23/2017           | None Scheduled          |
| <b>Last 5 Days with MH Visits</b> |                          |                      |                         |
| 10/23/2017                        |                          |                      |                         |
| Provider Name 1                   |                          | TELEPHONE SUD (545)  |                         |
| Provider Name 2                   |                          | TELEPHONE SUD (545)  |                         |
| 10/16/2017                        |                          |                      |                         |
| Provider Name 3                   |                          | TELEPHONE MH (527)   |                         |
| Provider Name 1                   |                          | TELEPHONE SUD (545)  |                         |
| Provider Name 2                   |                          | TELEPHONE SUD (545)  |                         |

Expand the patient details (see Slide 9) to view the Follow Up details:

- Clinic
- Provider

### # of MH Visits Since Discharge

Displays the number of MH Visits that qualify for the PDE definition of engagement since discharge

### First Follow-Up MH Visit

Displays the date of first qualifying MH Visit since discharge

### Most Recent MH Visit

Displays the date of first qualifying MH Visit since discharge

### Upcoming MH Appointment

Date of the next qualifying MH appointment scheduled

### Last 5 Days with MH Visits

By date of visit, the provider name, stop code, and clinic description for qualifying visits on the most recent 5 days where MH visits occurred (1 per day is counted in the definition of engagement)

## Data on Use of PDE Population Management Tool Since Launch

This section highlights use of the PDE population management tool since its launch.

The PDE population management tool to support population management was adopted quickly at VHA after activating the PDE measure (next **Figure**). The tool was fully functional by January 2018, a month during which 810 unique users accessed the tool 12,176 times. Since January 2018, 708 unique users opened the tool 14,669 times per month, on average. Users accessed the report at a rate of 20.7 times per month, on average, or approximately once per business day.

**Figure.** Count of Unique Users and Times Accessing the Post-discharge Engagement Population Management Tool

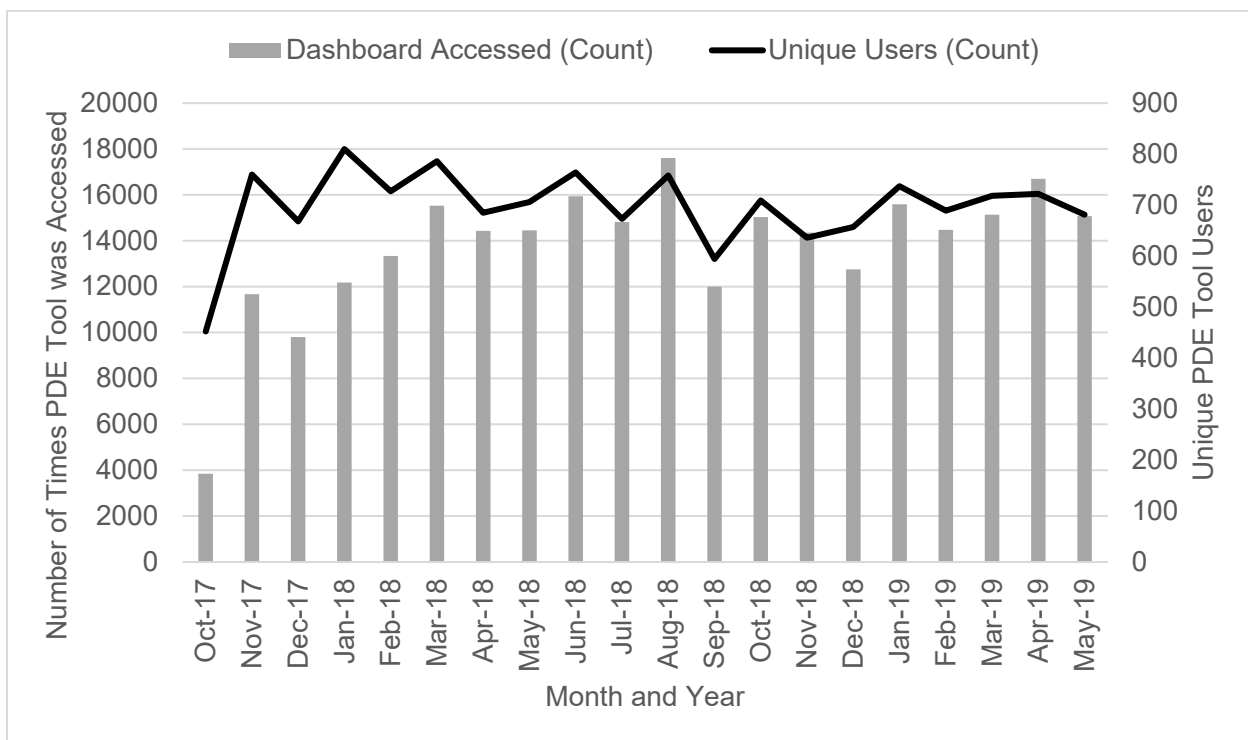



## Detailed Specifications of the Post-Discharge Engagement Quality Measure

### **Measure Description**

Percentage (%) of

- residential and MH discharges from non-MH inpatient units w/ principal discharge dx of MH/SUD w/ 2 or more MH visits (Group 1), or
- MH inpatient discharges w/ 3 or more MH visits (Group 2), or
- discharges involving active HRF for suicide or Suicide Symptoms and Behaviors dx w/ 4 or more MH visits (Group 3),

within 30 days of discharge.

### **Denominator Inclusion Criteria**

**Group 1 (lower intensity follow up): All discharges that meet Criteria 1a or 1b, and do not meet and Criteria for Group 2 or Group 3 discharges**

**Criteria 1a:** Mental Health Residential (RRTP) or Domiciliary discharges from the following treating specialties (i.e., bedsections)

| <b>Code</b> | <b>Treating Specialty Code Description</b> |
|-------------|--------------------------------------------|
| <b>25</b>   | PSYCH RESID REHAB TRMT PROG                |
| <b>26</b>   | PTSD RESIDENTIAL REHAB PROG                |
| <b>27</b>   | SUBSTANCE ABUSE RES TRMT PROG              |
| <b>37</b>   | DOMICILIARY CHV                            |

|            |                             |
|------------|-----------------------------|
| <b>39</b>  | GENERAL CWT/TR              |
| <b>85</b>  | DOMICILIARY                 |
| <b>86</b>  | DOMICILIARY SUBSTANCE ABUSE |
| <b>88</b>  | DOMICILIARY PTSD            |
| <b>109</b> | PSYCH RESID REHAB PROG      |
| <b>110</b> | PTSD RESID REHAB PROG       |
| <b>111</b> | SUBSTANCE ABUSE RESID PROG  |

*Criteria 1b:* non-MH Inpatient, Residential, or Domiciliary discharges (to qualify in Criteria 1b, discharge must be associated w/ principal diagnosis for MH in table below)

| <b>Code</b> | <b>Treating Specialty Code Description</b> | <b>Code</b> | <b>Treating Specialty Code Description</b> |
|-------------|--------------------------------------------|-------------|--------------------------------------------|
| <b>1</b>    | ALLERGY                                    | <b>40</b>   | INTERMEDIATE MEDICINE                      |
| <b>2</b>    | CARDIOLOGY                                 | <b>41</b>   | REHAB MEDICINE OBSERVATION                 |
| <b>3</b>    | PULMONARY, TUBERCULOSIS                    | <b>48</b>   | CARDIAC SURGERY                            |
| <b>4</b>    | zPULMONARY, NON-TB                         | <b>49</b>   | TRANSPLANTATION                            |
| <b>4</b>    | PULMONARY, NON-TB                          | <b>50</b>   | GENERAL SURGERY                            |
| <b>5</b>    | GERONTOLOGY                                | <b>51</b>   | OB/GYN                                     |
| <b>6</b>    | DERMATOLOGY                                | <b>52</b>   | NEUROSURGERY                               |
| <b>7</b>    | ENDOCRINOLOGY                              | <b>53</b>   | OPHTHALMOLOGY                              |
| <b>8</b>    | GASTROENTEROLOGY                           | <b>54</b>   | ORTHOPEDIC                                 |
| <b>9</b>    | HEMATOLOGY/ONCOLOGY                        | <b>55</b>   | EAR, NOSE, THROAT (ENT)                    |
| <b>10</b>   | NEUROLOGY                                  | <b>56</b>   | PLASTIC SURGERY                            |
| <b>11</b>   | EPILEPSY CENTER                            | <b>57</b>   | PROCTOLOGY                                 |
| <b>12</b>   | MEDICAL ICU                                | <b>58</b>   | THORACIC SURGERY                           |
| <b>13</b>   | WOMEN'S HEALTH                             | <b>59</b>   | UROLOGY                                    |

|    |                                |     |                               |
|----|--------------------------------|-----|-------------------------------|
| 13 | GEM PSYCHIATRY                 | 60  | ORAL SURGERY                  |
| 13 | CARDIAC INTENSIVE CARE UNIT    | 61  | PODIATRY                      |
| 14 | METABOLIC                      | 62  | PERIPHERAL VASCULAR           |
| 15 | zGENERAL(ACUTE MEDICINE        | 63  | SURGICAL ICU                  |
| 15 | GENERAL(ACUTE MEDICINE)        | 64  | NH SHORT STAY REHABILITATION  |
| 15 | GEN MEDICINE (ACUTE)           | 65  | SURGICAL OBSERVATION          |
| 16 | CARDIAC STEP DOWN UNIT         | 66  | NH SHORT STAY RESTORATIVE     |
| 16 | CARDIAC-STEP DOWN UNIT         | 67  | NH SHORT STAY MAINTENANCE     |
| 17 | TELEMETRY                      | 67  | NH SHORT-STAY CONTINUING CARE |
| 18 | NEUROLOGY OBSERVATION          | 69  | NH SHORT STAY DEMENTIA CARE   |
| 19 | STROKE UNIT                    | 78  | ANESTHESIOLOGY                |
| 20 | zREHABILITATION MEDICINE       | 82  | PM&R TRANSITIONAL REHAB       |
| 20 | REHABILITATION MEDICINE        | 87  | GEM DOMICILIARY               |
| 21 | BLIND REHAB                    | 95  | NH SHORT STAY SKILLED NURSING |
| 22 | SPINAL CORD INJURY             | 97  | SURGICAL STEPDOWN             |
| 23 | SPINAL CORD INJURY OBSERVATION | 100 | SHORT STAY GRECC-NHCU         |
| 24 | MEDICAL OBSERVATION            | 102 | SHORT STAY GRECC-GEM-NHCU     |
| 31 | z GEM ACUTE MEDICINE           | 103 | GRECC-GEM-REHAB               |
| 31 | GEM ACUTE MEDICINE             | 104 | GRECC-MED                     |
| 32 | GEM INTERMEDIATE CARE          | 106 | VASCULAR                      |
| 34 | GEM NEUROLOGY                  | 107 | MEDICAL STEP DOWN             |
| 35 | GEM REHABILITATION MEDICINE    | 108 | ED OBSERVATION                |
| 36 | BLIND REHAB OBSERVATION        | 112 | POLYTRAUMA REHAB UNIT         |

***[Criteria 1b continued]*** with a principal ICD-10 discharge diagnosis of a mental health condition:

| <b>ICD-10<br/>Diagnosis<br/>Code</b> | <b>Code Description</b>                                                               |
|--------------------------------------|---------------------------------------------------------------------------------------|
| <b>F06.0</b>                         | PSYCHOTIC DISORDER WITH HALLUCINATIONS DUE TO KNOWN PHYSIOLOGICAL CONDITION           |
| <b>F06.2</b>                         | PSYCHOTIC DISORDER WITH DELUSIONS DUE TO KNOWN PHYSIOLOGICAL CONDITION                |
| <b>F06.30</b>                        | MOOD DISORDER DUE TO KNOWN PHYSIOLOGICAL CONDITION, UNSPECIFIED                       |
| <b>F06.31</b>                        | MOOD DISORDER DUE TO KNOWN PHYSIOLOGICAL CONDITION WITH DEPRESSIVE FEATURES           |
| <b>F06.32</b>                        | MOOD DISORDER DUE TO KNOWN PHYSIOLOGICAL CONDITION WITH MAJOR DEPRESSIVE-LIKE EPISODE |
| <b>F06.33</b>                        | MOOD DISORDER DUE TO KNOWN PHYSIOLOGICAL CONDITION WITH MANIC FEATURES                |
| <b>F06.34</b>                        | MOOD DISORDER DUE TO KNOWN PHYSIOLOGICAL CONDITION WITH MIXED FEATURES                |
| <b>F06.4</b>                         | ANXIETY DISORDER DUE TO KNOWN PHYSIOLOGICAL CONDITION                                 |
| <b>F10.10</b>                        | ALCOHOL ABUSE, UNCOMPLICATED                                                          |
| <b>F10.120</b>                       | ALCOHOL ABUSE WITH INTOXICATION, UNCOMPLICATED                                        |
| <b>F10.121</b>                       | ALCOHOL ABUSE WITH INTOXICATION DELIRIUM                                              |
| <b>F10.129</b>                       | ALCOHOL ABUSE WITH INTOXICATION, UNSPECIFIED                                          |
| <b>F10.14</b>                        | ALCOHOL ABUSE WITH ALCOHOL-INDUCED MOOD DISORDER                                      |
| <b>F10.150</b>                       | ALCOHOL ABUSE WITH ALCOHOL-INDUCED PSYCHOTIC DISORDER WITH DELUSIONS                  |
| <b>F10.151</b>                       | ALCOHOL ABUSE WITH ALCOHOL-INDUCED PSYCHOTIC DISORDER WITH HALLUCINATIONS             |
| <b>F10.159</b>                       | ALCOHOL ABUSE WITH ALCOHOL-INDUCED PSYCHOTIC DISORDER, UNSPECIFIED                    |

|                |                                                                                |
|----------------|--------------------------------------------------------------------------------|
| <b>F10.180</b> | ALCOHOL ABUSE WITH ALCOHOL-INDUCED ANXIETY DISORDER                            |
| <b>F10.181</b> | ALCOHOL ABUSE WITH ALCOHOL-INDUCED SEXUAL DYSFUNCTION                          |
| <b>F10.182</b> | ALCOHOL ABUSE WITH ALCOHOL-INDUCED SLEEP DISORDER                              |
| <b>F10.188</b> | ALCOHOL ABUSE WITH OTHER ALCOHOL-INDUCED DISORDER                              |
| <b>F10.19</b>  | ALCOHOL ABUSE WITH UNSPECIFIED ALCOHOL-INDUCED DISORDER                        |
| <b>F10.20</b>  | ALCOHOL DEPENDENCE, UNCOMPLICATED                                              |
| <b>F10.21</b>  | ALCOHOL DEPENDENCE, IN REMISSION                                               |
| <b>F10.220</b> | ALCOHOL DEPENDENCE WITH INTOXICATION, UNCOMPLICATED                            |
| <b>F10.221</b> | ALCOHOL DEPENDENCE WITH INTOXICATION DELIRIUM                                  |
| <b>F10.229</b> | ALCOHOL DEPENDENCE WITH INTOXICATION, UNSPECIFIED                              |
| <b>F10.230</b> | ALCOHOL DEPENDENCE WITH WITHDRAWAL, UNCOMPLICATED                              |
| <b>F10.231</b> | ALCOHOL DEPENDENCE WITH WITHDRAWAL DELIRIUM                                    |
| <b>F10.232</b> | ALCOHOL DEPENDENCE WITH WITHDRAWAL WITH PERCEPTUAL DISTURBANCE                 |
| <b>F10.239</b> | ALCOHOL DEPENDENCE WITH WITHDRAWAL, UNSPECIFIED                                |
| <b>F10.24</b>  | ALCOHOL DEPENDENCE WITH ALCOHOL-INDUCED MOOD DISORDER                          |
| <b>F10.250</b> | ALCOHOL DEPENDENCE WITH ALCOHOL-INDUCED PSYCHOTIC DISORDER WITH DELUSIONS      |
| <b>F10.251</b> | ALCOHOL DEPENDENCE WITH ALCOHOL-INDUCED PSYCHOTIC DISORDER WITH HALLUCINATIONS |
| <b>F10.259</b> | ALCOHOL DEPENDENCE WITH ALCOHOL-INDUCED PSYCHOTIC DISORDER, UNSPECIFIED        |
| <b>F10.26</b>  | ALCOHOL DEPENDENCE WITH ALCOHOL-INDUCED PERSISTING AMNESTIC DISORDER           |
| <b>F10.27</b>  | ALCOHOL DEPENDENCE WITH ALCOHOL-INDUCED PERSISTING DEMENTIA                    |
| <b>F10.280</b> | ALCOHOL DEPENDENCE WITH ALCOHOL-INDUCED ANXIETY DISORDER                       |
| <b>F10.281</b> | ALCOHOL DEPENDENCE WITH ALCOHOL-INDUCED SEXUAL DYSFUNCTION                     |
| <b>F10.282</b> | ALCOHOL DEPENDENCE WITH ALCOHOL-INDUCED SLEEP DISORDER                         |
| <b>F10.288</b> | ALCOHOL DEPENDENCE WITH OTHER ALCOHOL-INDUCED DISORDER                         |

|                |                                                                                      |
|----------------|--------------------------------------------------------------------------------------|
| <b>F10.29</b>  | ALCOHOL DEPENDENCE WITH UNSPECIFIED ALCOHOL-INDUCED DISORDER                         |
| <b>F10.920</b> | ALCOHOL USE, UNSPECIFIED WITH INTOXICATION, UNCOMPLICATED                            |
| <b>F10.921</b> | ALCOHOL USE, UNSPECIFIED WITH INTOXICATION DELIRIUM                                  |
| <b>F10.929</b> | ALCOHOL USE, UNSPECIFIED WITH INTOXICATION, UNSPECIFIED                              |
| <b>F10.94</b>  | ALCOHOL USE, UNSPECIFIED WITH ALCOHOL-INDUCED MOOD DISORDER                          |
| <b>F10.950</b> | ALCOHOL USE, UNSPECIFIED WITH ALCOHOL-INDUCED PSYCHOTIC DISORDER WITH DELUSIONS      |
| <b>F10.951</b> | ALCOHOL USE, UNSPECIFIED WITH ALCOHOL-INDUCED PSYCHOTIC DISORDER WITH HALLUCINATIONS |
| <b>F10.959</b> | ALCOHOL USE, UNSPECIFIED WITH ALCOHOL-INDUCED PSYCHOTIC DISORDER, UNSPECIFIED        |
| <b>F10.96</b>  | ALCOHOL USE, UNSPECIFIED WITH ALCOHOL-INDUCED PERSISTING AMNESTIC DISORDER           |
| <b>F10.97</b>  | ALCOHOL USE, UNSPECIFIED WITH ALCOHOL-INDUCED PERSISTING DEMENTIA                    |
| <b>F10.980</b> | ALCOHOL USE, UNSPECIFIED WITH ALCOHOL-INDUCED ANXIETY DISORDER                       |
| <b>F10.981</b> | ALCOHOL USE, UNSPECIFIED WITH ALCOHOL-INDUCED SEXUAL DYSFUNCTION                     |
| <b>F10.982</b> | ALCOHOL USE, UNSPECIFIED WITH ALCOHOL-INDUCED SLEEP DISORDER                         |
| <b>F10.988</b> | ALCOHOL USE, UNSPECIFIED WITH OTHER ALCOHOL-INDUCED DISORDER                         |
| <b>F10.99</b>  | ALCOHOL USE, UNSPECIFIED WITH UNSPECIFIED ALCOHOL-INDUCED DISORDER                   |
| <b>F11.10</b>  | OPIOID ABUSE, UNCOMPLICATED                                                          |
| <b>F11.120</b> | OPIOID ABUSE WITH INTOXICATION, UNCOMPLICATED                                        |
| <b>F11.121</b> | OPIOID ABUSE WITH INTOXICATION DELIRIUM                                              |
| <b>F11.122</b> | OPIOID ABUSE WITH INTOXICATION WITH PERCEPTUAL DISTURBANCE                           |
| <b>F11.129</b> | OPIOID ABUSE WITH INTOXICATION, UNSPECIFIED                                          |
| <b>F11.14</b>  | OPIOID ABUSE WITH OPIOID-INDUCED MOOD DISORDER                                       |
| <b>F11.150</b> | OPIOID ABUSE WITH OPIOID-INDUCED PSYCHOTIC DISORDER WITH DELUSIONS                   |

|                |                                                                              |
|----------------|------------------------------------------------------------------------------|
| <b>F11.151</b> | OPIOID ABUSE WITH OPIOID-INDUCED PSYCHOTIC DISORDER WITH HALLUCINATIONS      |
| <b>F11.159</b> | OPIOID ABUSE WITH OPIOID-INDUCED PSYCHOTIC DISORDER, UNSPECIFIED             |
| <b>F11.181</b> | OPIOID ABUSE WITH OPIOID-INDUCED SEXUAL DYSFUNCTION                          |
| <b>F11.182</b> | OPIOID ABUSE WITH OPIOID-INDUCED SLEEP DISORDER                              |
| <b>F11.188</b> | OPIOID ABUSE WITH OTHER OPIOID-INDUCED DISORDER                              |
| <b>F11.19</b>  | OPIOID ABUSE WITH UNSPECIFIED OPIOID-INDUCED DISORDER                        |
| <b>F11.20</b>  | OPIOID DEPENDENCE, UNCOMPLICATED                                             |
| <b>F11.21</b>  | OPIOID DEPENDENCE, IN REMISSION                                              |
| <b>F11.220</b> | OPIOID DEPENDENCE WITH INTOXICATION, UNCOMPLICATED                           |
| <b>F11.221</b> | OPIOID DEPENDENCE WITH INTOXICATION DELIRIUM                                 |
| <b>F11.222</b> | OPIOID DEPENDENCE WITH INTOXICATION WITH PERCEPTUAL DISTURBANCE              |
| <b>F11.229</b> | OPIOID DEPENDENCE WITH INTOXICATION, UNSPECIFIED                             |
| <b>F11.23</b>  | OPIOID DEPENDENCE WITH WITHDRAWAL                                            |
| <b>F11.24</b>  | OPIOID DEPENDENCE WITH OPIOID-INDUCED MOOD DISORDER                          |
| <b>F11.250</b> | OPIOID DEPENDENCE WITH OPIOID-INDUCED PSYCHOTIC DISORDER WITH DELUSIONS      |
| <b>F11.251</b> | OPIOID DEPENDENCE WITH OPIOID-INDUCED PSYCHOTIC DISORDER WITH HALLUCINATIONS |
| <b>F11.259</b> | OPIOID DEPENDENCE WITH OPIOID-INDUCED PSYCHOTIC DISORDER, UNSPECIFIED        |
| <b>F11.281</b> | OPIOID DEPENDENCE WITH OPIOID-INDUCED SEXUAL DYSFUNCTION                     |
| <b>F11.282</b> | OPIOID DEPENDENCE WITH OPIOID-INDUCED SLEEP DISORDER                         |
| <b>F11.288</b> | OPIOID DEPENDENCE WITH OTHER OPIOID-INDUCED DISORDER                         |
| <b>F11.29</b>  | OPIOID DEPENDENCE WITH UNSPECIFIED OPIOID-INDUCED DISORDER                   |
| <b>F11.90</b>  | OPIOID USE, UNSPECIFIED, UNCOMPLICATED                                       |
| <b>F11.920</b> | OPIOID USE, UNSPECIFIED WITH INTOXICATION, UNCOMPLICATED                     |
| <b>F11.921</b> | OPIOID USE, UNSPECIFIED WITH INTOXICATION DELIRIUM                           |

|                |                                                                                    |
|----------------|------------------------------------------------------------------------------------|
| <b>F11.922</b> | OPIOID USE, UNSPECIFIED WITH INTOXICATION WITH PERCEPTUAL DISTURBANCE              |
| <b>F11.929</b> | OPIOID USE, UNSPECIFIED WITH INTOXICATION, UNSPECIFIED                             |
| <b>F11.93</b>  | OPIOID USE, UNSPECIFIED WITH WITHDRAWAL                                            |
| <b>F11.94</b>  | OPIOID USE, UNSPECIFIED WITH OPIOID-INDUCED MOOD DISORDER                          |
| <b>F11.950</b> | OPIOID USE, UNSPECIFIED WITH OPIOID-INDUCED PSYCHOTIC DISORDER WITH DELUSIONS      |
| <b>F11.951</b> | OPIOID USE, UNSPECIFIED WITH OPIOID-INDUCED PSYCHOTIC DISORDER WITH HALLUCINATIONS |
| <b>F11.959</b> | OPIOID USE, UNSPECIFIED WITH OPIOID-INDUCED PSYCHOTIC DISORDER, UNSPECIFIED        |
| <b>F11.981</b> | OPIOID USE, UNSPECIFIED WITH OPIOID-INDUCED SEXUAL DYSFUNCTION                     |
| <b>F11.982</b> | OPIOID USE, UNSPECIFIED WITH OPIOID-INDUCED SLEEP DISORDER                         |
| <b>F11.988</b> | OPIOID USE, UNSPECIFIED WITH OTHER OPIOID-INDUCED DISORDER                         |
| <b>F11.99</b>  | OPIOID USE, UNSPECIFIED WITH UNSPECIFIED OPIOID-INDUCED DISORDER                   |
| <b>F12.10</b>  | CANNABIS ABUSE, UNCOMPLICATED                                                      |
| <b>F12.120</b> | CANNABIS ABUSE WITH INTOXICATION, UNCOMPLICATED                                    |
| <b>F12.121</b> | CANNABIS ABUSE WITH INTOXICATION DELIRIUM                                          |
| <b>F12.122</b> | CANNABIS ABUSE WITH INTOXICATION WITH PERCEPTUAL DISTURBANCE                       |
| <b>F12.129</b> | CANNABIS ABUSE WITH INTOXICATION, UNSPECIFIED                                      |
| <b>F12.150</b> | CANNABIS ABUSE WITH PSYCHOTIC DISORDER WITH DELUSIONS                              |
| <b>F12.151</b> | CANNABIS ABUSE WITH PSYCHOTIC DISORDER WITH HALLUCINATIONS                         |
| <b>F12.159</b> | CANNABIS ABUSE WITH PSYCHOTIC DISORDER, UNSPECIFIED                                |
| <b>F12.180</b> | CANNABIS ABUSE WITH CANNABIS-INDUCED ANXIETY DISORDER                              |
| <b>F12.188</b> | CANNABIS ABUSE WITH OTHER CANNABIS-INDUCED DISORDER                                |
| <b>F12.19</b>  | CANNABIS ABUSE WITH UNSPECIFIED CANNABIS-INDUCED DISORDER                          |
| <b>F12.20</b>  | CANNABIS DEPENDENCE, UNCOMPLICATED                                                 |
| <b>F12.21</b>  | CANNABIS DEPENDENCE, IN REMISSION                                                  |
| <b>F12.220</b> | CANNABIS DEPENDENCE WITH INTOXICATION, UNCOMPLICATED                               |



|                |                                                                         |
|----------------|-------------------------------------------------------------------------|
| <b>F12.221</b> | CANNABIS DEPENDENCE WITH INTOXICATION DELIRIUM                          |
| <b>F12.222</b> | CANNABIS DEPENDENCE WITH INTOXICATION WITH PERCEPTUAL DISTURBANCE       |
| <b>F12.229</b> | CANNABIS DEPENDENCE WITH INTOXICATION, UNSPECIFIED                      |
| <b>F12.250</b> | CANNABIS DEPENDENCE WITH PSYCHOTIC DISORDER WITH DELUSIONS              |
| <b>F12.251</b> | CANNABIS DEPENDENCE WITH PSYCHOTIC DISORDER WITH HALLUCINATIONS         |
| <b>F12.259</b> | CANNABIS DEPENDENCE WITH PSYCHOTIC DISORDER, UNSPECIFIED                |
| <b>F12.280</b> | CANNABIS DEPENDENCE WITH CANNABIS-INDUCED ANXIETY DISORDER              |
| <b>F12.288</b> | CANNABIS DEPENDENCE WITH OTHER CANNABIS-INDUCED DISORDER                |
| <b>F12.29</b>  | CANNABIS DEPENDENCE WITH UNSPECIFIED CANNABIS-INDUCED DISORDER          |
| <b>F12.90</b>  | CANNABIS USE, UNSPECIFIED, UNCOMPLICATED                                |
| <b>F12.920</b> | CANNABIS USE, UNSPECIFIED WITH INTOXICATION, UNCOMPLICATED              |
| <b>F12.921</b> | CANNABIS USE, UNSPECIFIED WITH INTOXICATION DELIRIUM                    |
| <b>F12.922</b> | CANNABIS USE, UNSPECIFIED WITH INTOXICATION WITH PERCEPTUAL DISTURBANCE |
| <b>F12.929</b> | CANNABIS USE, UNSPECIFIED WITH INTOXICATION, UNSPECIFIED                |
| <b>F12.950</b> | CANNABIS USE, UNSPECIFIED WITH PSYCHOTIC DISORDER WITH DELUSIONS        |
| <b>F12.951</b> | CANNABIS USE, UNSPECIFIED WITH PSYCHOTIC DISORDER WITH HALLUCINATIONS   |
| <b>F12.959</b> | CANNABIS USE, UNSPECIFIED WITH PSYCHOTIC DISORDER, UNSPECIFIED          |
| <b>F12.980</b> | CANNABIS USE, UNSPECIFIED WITH ANXIETY DISORDER                         |
| <b>F12.988</b> | CANNABIS USE, UNSPECIFIED WITH OTHER CANNABIS-INDUCED DISORDER          |
| <b>F12.99</b>  | CANNABIS USE, UNSPECIFIED WITH UNSPECIFIED CANNABIS-INDUCED DISORDER    |
| <b>F13.10</b>  | SEDATIVE, HYPNOTIC OR ANXIOLYTIC ABUSE, UNCOMPLICATED                   |
| <b>F13.120</b> | SEDATIVE, HYPNOTIC OR ANXIOLYTIC ABUSE WITH INTOXICATION, UNCOMPLICATED |
| <b>F13.121</b> | SEDATIVE, HYPNOTIC OR ANXIOLYTIC ABUSE WITH INTOXICATION DELIRIUM       |

|                |                                                                                                                             |
|----------------|-----------------------------------------------------------------------------------------------------------------------------|
| <b>F13.129</b> | SEDATIVE, HYPNOTIC OR ANXIOLYTIC ABUSE WITH INTOXICATION, UNSPECIFIED                                                       |
| <b>F13.14</b>  | SEDATIVE, HYPNOTIC OR ANXIOLYTIC ABUSE WITH SEDATIVE, HYPNOTIC OR ANXIOLYTIC-INDUCED MOOD DISORDER                          |
| <b>F13.150</b> | SEDATIVE, HYPNOTIC OR ANXIOLYTIC ABUSE WITH SEDATIVE, HYPNOTIC OR ANXIOLYTIC-INDUCED PSYCHOTIC DISORDER WITH DELUSIONS      |
| <b>F13.151</b> | SEDATIVE, HYPNOTIC OR ANXIOLYTIC ABUSE WITH SEDATIVE, HYPNOTIC OR ANXIOLYTIC-INDUCED PSYCHOTIC DISORDER WITH HALLUCINATIONS |
| <b>F13.159</b> | SEDATIVE, HYPNOTIC OR ANXIOLYTIC ABUSE WITH SEDATIVE, HYPNOTIC OR ANXIOLYTIC-INDUCED PSYCHOTIC DISORDER, UNSPECIFIED        |
| <b>F13.180</b> | SEDATIVE, HYPNOTIC OR ANXIOLYTIC ABUSE WITH SEDATIVE, HYPNOTIC OR ANXIOLYTIC-INDUCED ANXIETY DISORDER                       |
| <b>F13.181</b> | SEDATIVE, HYPNOTIC OR ANXIOLYTIC ABUSE WITH SEDATIVE, HYPNOTIC OR ANXIOLYTIC-INDUCED SEXUAL DYSFUNCTION                     |
| <b>F13.182</b> | SEDATIVE, HYPNOTIC OR ANXIOLYTIC ABUSE WITH SEDATIVE, HYPNOTIC OR ANXIOLYTIC-INDUCED SLEEP DISORDER                         |
| <b>F13.188</b> | SEDATIVE, HYPNOTIC OR ANXIOLYTIC ABUSE WITH OTHER SEDATIVE, HYPNOTIC OR ANXIOLYTIC-INDUCED DISORDER                         |
| <b>F13.19</b>  | SEDATIVE, HYPNOTIC OR ANXIOLYTIC ABUSE WITH UNSPECIFIED SEDATIVE, HYPNOTIC OR ANXIOLYTIC-INDUCED DISORDER                   |
| <b>F13.20</b>  | SEDATIVE, HYPNOTIC OR ANXIOLYTIC DEPENDENCE, UNCOMPLICATED                                                                  |
| <b>F13.21</b>  | SEDATIVE, HYPNOTIC OR ANXIOLYTIC DEPENDENCE, IN REMISSION                                                                   |
| <b>F13.220</b> | SEDATIVE, HYPNOTIC OR ANXIOLYTIC DEPENDENCE WITH INTOXICATION, UNCOMPLICATED                                                |
| <b>F13.221</b> | SEDATIVE, HYPNOTIC OR ANXIOLYTIC DEPENDENCE WITH INTOXICATION DELIRIUM                                                      |
| <b>F13.229</b> | SEDATIVE, HYPNOTIC OR ANXIOLYTIC DEPENDENCE WITH INTOXICATION, UNSPECIFIED                                                  |
| <b>F13.230</b> | SEDATIVE, HYPNOTIC OR ANXIOLYTIC DEPENDENCE WITH WITHDRAWAL, UNCOMPLICATED                                                  |
| <b>F13.231</b> | SEDATIVE, HYPNOTIC OR ANXIOLYTIC DEPENDENCE WITH WITHDRAWAL DELIRIUM                                                        |
| <b>F13.232</b> | SEDATIVE, HYPNOTIC OR ANXIOLYTIC DEPENDENCE WITH WITHDRAWAL WITH PERCEPTUAL DISTURBANCE                                     |

|                |                                                                                                                                  |
|----------------|----------------------------------------------------------------------------------------------------------------------------------|
| <b>F13.239</b> | SEDATIVE, HYPNOTIC OR ANXIOLYTIC DEPENDENCE WITH WITHDRAWAL, UNSPECIFIED                                                         |
| <b>F13.24</b>  | SEDATIVE, HYPNOTIC OR ANXIOLYTIC DEPENDENCE WITH SEDATIVE, HYPNOTIC OR ANXIOLYTIC-INDUCED MOOD DISORDER                          |
| <b>F13.250</b> | SEDATIVE, HYPNOTIC OR ANXIOLYTIC DEPENDENCE WITH SEDATIVE, HYPNOTIC OR ANXIOLYTIC-INDUCED PSYCHOTIC DISORDER WITH DELUSIONS      |
| <b>F13.251</b> | SEDATIVE, HYPNOTIC OR ANXIOLYTIC DEPENDENCE WITH SEDATIVE, HYPNOTIC OR ANXIOLYTIC-INDUCED PSYCHOTIC DISORDER WITH HALLUCINATIONS |
| <b>F13.259</b> | SEDATIVE, HYPNOTIC OR ANXIOLYTIC DEPENDENCE WITH SEDATIVE, HYPNOTIC OR ANXIOLYTIC-INDUCED PSYCHOTIC DISORDER, UNSPECIFIED        |
| <b>F13.26</b>  | SEDATIVE, HYPNOTIC OR ANXIOLYTIC DEPENDENCE WITH SEDATIVE, HYPNOTIC OR ANXIOLYTIC-INDUCED PERSISTING AMNESTIC DISORDER           |
| <b>F13.27</b>  | SEDATIVE, HYPNOTIC OR ANXIOLYTIC DEPENDENCE WITH SEDATIVE, HYPNOTIC OR ANXIOLYTIC-INDUCED PERSISTING DEMENTIA                    |
| <b>F13.280</b> | SEDATIVE, HYPNOTIC OR ANXIOLYTIC DEPENDENCE WITH SEDATIVE, HYPNOTIC OR ANXIOLYTIC-INDUCED ANXIETY DISORDER                       |
| <b>F13.281</b> | SEDATIVE, HYPNOTIC OR ANXIOLYTIC DEPENDENCE WITH SEDATIVE, HYPNOTIC OR ANXIOLYTIC-INDUCED SEXUAL DYSFUNCTION                     |
| <b>F13.282</b> | SEDATIVE, HYPNOTIC OR ANXIOLYTIC DEPENDENCE WITH SEDATIVE, HYPNOTIC OR ANXIOLYTIC-INDUCED SLEEP DISORDER                         |
| <b>F13.288</b> | SEDATIVE, HYPNOTIC OR ANXIOLYTIC DEPENDENCE WITH OTHER SEDATIVE, HYPNOTIC OR ANXIOLYTIC-INDUCED DISORDER                         |
| <b>F13.29</b>  | SEDATIVE, HYPNOTIC OR ANXIOLYTIC DEPENDENCE WITH UNSPECIFIED SEDATIVE, HYPNOTIC OR ANXIOLYTIC-INDUCED DISORDER                   |
| <b>F13.90</b>  | SEDATIVE, HYPNOTIC, OR ANXIOLYTIC USE, UNSPECIFIED, UNCOMPLICATED                                                                |
| <b>F13.920</b> | SEDATIVE, HYPNOTIC OR ANXIOLYTIC USE, UNSPECIFIED WITH INTOXICATION, UNCOMPLICATED                                               |
| <b>F13.921</b> | SEDATIVE, HYPNOTIC OR ANXIOLYTIC USE, UNSPECIFIED WITH INTOXICATION DELIRIUM                                                     |
| <b>F13.929</b> | SEDATIVE, HYPNOTIC OR ANXIOLYTIC USE, UNSPECIFIED WITH INTOXICATION, UNSPECIFIED                                                 |
| <b>F13.930</b> | SEDATIVE, HYPNOTIC OR ANXIOLYTIC USE, UNSPECIFIED WITH WITHDRAWAL, UNCOMPLICATED                                                 |

|                |                                                                                                                                        |
|----------------|----------------------------------------------------------------------------------------------------------------------------------------|
| <b>F13.931</b> | SEDATIVE, HYPNOTIC OR ANXIOLYTIC USE, UNSPECIFIED WITH WITHDRAWAL DELIRIUM                                                             |
| <b>F13.932</b> | SEDATIVE, HYPNOTIC OR ANXIOLYTIC USE, UNSPECIFIED WITH WITHDRAWAL WITH PERCEPTUAL DISTURBANCES                                         |
| <b>F13.939</b> | SEDATIVE, HYPNOTIC OR ANXIOLYTIC USE, UNSPECIFIED WITH WITHDRAWAL, UNSPECIFIED                                                         |
| <b>F13.94</b>  | SEDATIVE, HYPNOTIC OR ANXIOLYTIC USE, UNSPECIFIED WITH SEDATIVE, HYPNOTIC OR ANXIOLYTIC-INDUCED MOOD DISORDER                          |
| <b>F13.950</b> | SEDATIVE, HYPNOTIC OR ANXIOLYTIC USE, UNSPECIFIED WITH SEDATIVE, HYPNOTIC OR ANXIOLYTIC-INDUCED PSYCHOTIC DISORDER WITH DELUSIONS      |
| <b>F13.951</b> | SEDATIVE, HYPNOTIC OR ANXIOLYTIC USE, UNSPECIFIED WITH SEDATIVE, HYPNOTIC OR ANXIOLYTIC-INDUCED PSYCHOTIC DISORDER WITH HALLUCINATIONS |
| <b>F13.959</b> | SEDATIVE, HYPNOTIC OR ANXIOLYTIC USE, UNSPECIFIED WITH SEDATIVE, HYPNOTIC OR ANXIOLYTIC-INDUCED PSYCHOTIC DISORDER, UNSPECIFIED        |
| <b>F13.96</b>  | SEDATIVE, HYPNOTIC OR ANXIOLYTIC USE, UNSPECIFIED WITH SEDATIVE, HYPNOTIC OR ANXIOLYTIC-INDUCED PERSISTING AMNESTIC DISORDER           |
| <b>F13.97</b>  | SEDATIVE, HYPNOTIC OR ANXIOLYTIC USE, UNSPECIFIED WITH SEDATIVE, HYPNOTIC OR ANXIOLYTIC-INDUCED PERSISTING DEMENTIA                    |
| <b>F13.980</b> | SEDATIVE, HYPNOTIC OR ANXIOLYTIC USE, UNSPECIFIED WITH SEDATIVE, HYPNOTIC OR ANXIOLYTIC-INDUCED ANXIETY DISORDER                       |
| <b>F13.981</b> | SEDATIVE, HYPNOTIC OR ANXIOLYTIC USE, UNSPECIFIED WITH SEDATIVE, HYPNOTIC OR ANXIOLYTIC-INDUCED SEXUAL DYSFUNCTION                     |
| <b>F13.982</b> | SEDATIVE, HYPNOTIC OR ANXIOLYTIC USE, UNSPECIFIED WITH SEDATIVE, HYPNOTIC OR ANXIOLYTIC-INDUCED SLEEP DISORDER                         |
| <b>F13.988</b> | SEDATIVE, HYPNOTIC OR ANXIOLYTIC USE, UNSPECIFIED WITH OTHER SEDATIVE, HYPNOTIC OR ANXIOLYTIC-INDUCED DISORDER                         |
| <b>F13.99</b>  | SEDATIVE, HYPNOTIC OR ANXIOLYTIC USE, UNSPECIFIED WITH UNSPECIFIED SEDATIVE, HYPNOTIC OR ANXIOLYTIC-INDUCED DISORDER                   |
| <b>F14.10</b>  | COCAINE ABUSE, UNCOMPLICATED                                                                                                           |
| <b>F14.120</b> | COCAINE ABUSE WITH INTOXICATION, UNCOMPLICATED                                                                                         |
| <b>F14.121</b> | COCAINE ABUSE WITH INTOXICATION WITH DELIRIUM                                                                                          |
| <b>F14.122</b> | COCAINE ABUSE WITH INTOXICATION WITH PERCEPTUAL DISTURBANCE                                                                            |

|                |                                                                                |
|----------------|--------------------------------------------------------------------------------|
| <b>F14.129</b> | COCAINE ABUSE WITH INTOXICATION, UNSPECIFIED                                   |
| <b>F14.14</b>  | COCAINE ABUSE WITH COCAINE-INDUCED MOOD DISORDER                               |
| <b>F14.150</b> | COCAINE ABUSE WITH COCAINE-INDUCED PSYCHOTIC DISORDER WITH DELUSIONS           |
| <b>F14.151</b> | COCAINE ABUSE WITH COCAINE-INDUCED PSYCHOTIC DISORDER WITH HALLUCINATIONS      |
| <b>F14.159</b> | COCAINE ABUSE WITH COCAINE-INDUCED PSYCHOTIC DISORDER, UNSPECIFIED             |
| <b>F14.180</b> | COCAINE ABUSE WITH COCAINE-INDUCED ANXIETY DISORDER                            |
| <b>F14.181</b> | COCAINE ABUSE WITH COCAINE-INDUCED SEXUAL DYSFUNCTION                          |
| <b>F14.182</b> | COCAINE ABUSE WITH COCAINE-INDUCED SLEEP DISORDER                              |
| <b>F14.188</b> | COCAINE ABUSE WITH OTHER COCAINE-INDUCED DISORDER                              |
| <b>F14.19</b>  | COCAINE ABUSE WITH UNSPECIFIED COCAINE-INDUCED DISORDER                        |
| <b>F14.20</b>  | COCAINE DEPENDENCE, UNCOMPLICATED                                              |
| <b>F14.21</b>  | COCAINE DEPENDENCE, IN REMISSION                                               |
| <b>F14.220</b> | COCAINE DEPENDENCE WITH INTOXICATION, UNCOMPLICATED                            |
| <b>F14.221</b> | COCAINE DEPENDENCE WITH INTOXICATION DELIRIUM                                  |
| <b>F14.222</b> | COCAINE DEPENDENCE WITH INTOXICATION WITH PERCEPTUAL DISTURBANCE               |
| <b>F14.229</b> | COCAINE DEPENDENCE WITH INTOXICATION, UNSPECIFIED                              |
| <b>F14.23</b>  | COCAINE DEPENDENCE WITH WITHDRAWAL                                             |
| <b>F14.24</b>  | COCAINE DEPENDENCE WITH COCAINE-INDUCED MOOD DISORDER                          |
| <b>F14.250</b> | COCAINE DEPENDENCE WITH COCAINE-INDUCED PSYCHOTIC DISORDER WITH DELUSIONS      |
| <b>F14.251</b> | COCAINE DEPENDENCE WITH COCAINE-INDUCED PSYCHOTIC DISORDER WITH HALLUCINATIONS |
| <b>F14.259</b> | COCAINE DEPENDENCE WITH COCAINE-INDUCED PSYCHOTIC DISORDER, UNSPECIFIED        |
| <b>F14.280</b> | COCAINE DEPENDENCE WITH COCAINE-INDUCED ANXIETY DISORDER                       |
| <b>F14.281</b> | COCAINE DEPENDENCE WITH COCAINE-INDUCED SEXUAL DYSFUNCTION                     |

|                |                                                                                      |
|----------------|--------------------------------------------------------------------------------------|
| <b>F14.282</b> | COCAINE DEPENDENCE WITH COCAINE-INDUCED SLEEP DISORDER                               |
| <b>F14.288</b> | COCAINE DEPENDENCE WITH OTHER COCAINE-INDUCED DISORDER                               |
| <b>F14.29</b>  | COCAINE DEPENDENCE WITH UNSPECIFIED COCAINE-INDUCED DISORDER                         |
| <b>F14.90</b>  | COCAINE USE, UNSPECIFIED, UNCOMPLICATED                                              |
| <b>F14.920</b> | COCAINE USE, UNSPECIFIED WITH INTOXICATION, UNCOMPLICATED                            |
| <b>F14.921</b> | COCAINE USE, UNSPECIFIED WITH INTOXICATION DELIRIUM                                  |
| <b>F14.922</b> | COCAINE USE, UNSPECIFIED WITH INTOXICATION WITH PERCEPTUAL DISTURBANCE               |
| <b>F14.929</b> | COCAINE USE, UNSPECIFIED WITH INTOXICATION, UNSPECIFIED                              |
| <b>F14.94</b>  | COCAINE USE, UNSPECIFIED WITH COCAINE-INDUCED MOOD DISORDER                          |
| <b>F14.950</b> | COCAINE USE, UNSPECIFIED WITH COCAINE-INDUCED PSYCHOTIC DISORDER WITH DELUSIONS      |
| <b>F14.951</b> | COCAINE USE, UNSPECIFIED WITH COCAINE-INDUCED PSYCHOTIC DISORDER WITH HALLUCINATIONS |
| <b>F14.959</b> | COCAINE USE, UNSPECIFIED WITH COCAINE-INDUCED PSYCHOTIC DISORDER, UNSPECIFIED        |
| <b>F14.980</b> | COCAINE USE, UNSPECIFIED WITH COCAINE-INDUCED ANXIETY DISORDER                       |
| <b>F14.981</b> | COCAINE USE, UNSPECIFIED WITH COCAINE-INDUCED SEXUAL DYSFUNCTION                     |
| <b>F14.982</b> | COCAINE USE, UNSPECIFIED WITH COCAINE-INDUCED SLEEP DISORDER                         |
| <b>F14.988</b> | COCAINE USE, UNSPECIFIED WITH OTHER COCAINE-INDUCED DISORDER                         |
| <b>F14.99</b>  | COCAINE USE, UNSPECIFIED WITH UNSPECIFIED COCAINE-INDUCED DISORDER                   |
| <b>F15.10</b>  | OTHER STIMULANT ABUSE, UNCOMPLICATED                                                 |
| <b>F15.120</b> | OTHER STIMULANT ABUSE WITH INTOXICATION, UNCOMPLICATED                               |
| <b>F15.121</b> | OTHER STIMULANT ABUSE WITH INTOXICATION DELIRIUM                                     |
| <b>F15.122</b> | OTHER STIMULANT ABUSE WITH INTOXICATION WITH PERCEPTUAL DISTURBANCE                  |
| <b>F15.129</b> | OTHER STIMULANT ABUSE WITH INTOXICATION, UNSPECIFIED                                 |
| <b>F15.14</b>  | OTHER STIMULANT ABUSE WITH STIMULANT-INDUCED MOOD DISORDER                           |

|                |                                                                                          |
|----------------|------------------------------------------------------------------------------------------|
| <b>F15.150</b> | OTHER STIMULANT ABUSE WITH STIMULANT-INDUCED PSYCHOTIC DISORDER WITH DELUSIONS           |
| <b>F15.151</b> | OTHER STIMULANT ABUSE WITH STIMULANT-INDUCED PSYCHOTIC DISORDER WITH HALLUCINATIONS      |
| <b>F15.159</b> | OTHER STIMULANT ABUSE WITH STIMULANT-INDUCED PSYCHOTIC DISORDER, UNSPECIFIED             |
| <b>F15.180</b> | OTHER STIMULANT ABUSE WITH STIMULANT-INDUCED ANXIETY DISORDER                            |
| <b>F15.181</b> | OTHER STIMULANT ABUSE WITH STIMULANT-INDUCED SEXUAL DYSFUNCTION                          |
| <b>F15.182</b> | OTHER STIMULANT ABUSE WITH STIMULANT-INDUCED SLEEP DISORDER                              |
| <b>F15.188</b> | OTHER STIMULANT ABUSE WITH OTHER STIMULANT-INDUCED DISORDER                              |
| <b>F15.19</b>  | OTHER STIMULANT ABUSE WITH UNSPECIFIED STIMULANT-INDUCED DISORDER                        |
| <b>F15.20</b>  | OTHER STIMULANT DEPENDENCE, UNCOMPLICATED                                                |
| <b>F15.21</b>  | OTHER STIMULANT DEPENDENCE, IN REMISSION                                                 |
| <b>F15.220</b> | OTHER STIMULANT DEPENDENCE WITH INTOXICATION, UNCOMPLICATED                              |
| <b>F15.221</b> | OTHER STIMULANT DEPENDENCE WITH INTOXICATION DELIRIUM                                    |
| <b>F15.222</b> | OTHER STIMULANT DEPENDENCE WITH INTOXICATION WITH PERCEPTUAL DISTURBANCE                 |
| <b>F15.229</b> | OTHER STIMULANT DEPENDENCE WITH INTOXICATION, UNSPECIFIED                                |
| <b>F15.23</b>  | OTHER STIMULANT DEPENDENCE WITH WITHDRAWAL                                               |
| <b>F15.24</b>  | OTHER STIMULANT DEPENDENCE WITH STIMULANT-INDUCED MOOD DISORDER                          |
| <b>F15.250</b> | OTHER STIMULANT DEPENDENCE WITH STIMULANT-INDUCED PSYCHOTIC DISORDER WITH DELUSIONS      |
| <b>F15.251</b> | OTHER STIMULANT DEPENDENCE WITH STIMULANT-INDUCED PSYCHOTIC DISORDER WITH HALLUCINATIONS |
| <b>F15.259</b> | OTHER STIMULANT DEPENDENCE WITH STIMULANT-INDUCED PSYCHOTIC DISORDER, UNSPECIFIED        |
| <b>F15.280</b> | OTHER STIMULANT DEPENDENCE WITH STIMULANT-INDUCED ANXIETY DISORDER                       |

|                |                                                                                                |
|----------------|------------------------------------------------------------------------------------------------|
| <b>F15.281</b> | OTHER STIMULANT DEPENDENCE WITH STIMULANT-INDUCED SEXUAL DYSFUNCTION                           |
| <b>F15.282</b> | OTHER STIMULANT DEPENDENCE WITH STIMULANT-INDUCED SLEEP DISORDER                               |
| <b>F15.288</b> | OTHER STIMULANT DEPENDENCE WITH OTHER STIMULANT-INDUCED DISORDER                               |
| <b>F15.29</b>  | OTHER STIMULANT DEPENDENCE WITH UNSPECIFIED STIMULANT-INDUCED DISORDER                         |
| <b>F15.90</b>  | OTHER STIMULANT USE, UNSPECIFIED, UNCOMPLICATED                                                |
| <b>F15.920</b> | OTHER STIMULANT USE, UNSPECIFIED WITH INTOXICATION, UNCOMPLICATED                              |
| <b>F15.921</b> | OTHER STIMULANT USE, UNSPECIFIED WITH INTOXICATION DELIRIUM                                    |
| <b>F15.922</b> | OTHER STIMULANT USE, UNSPECIFIED WITH INTOXICATION WITH PERCEPTUAL DISTURBANCE                 |
| <b>F15.929</b> | OTHER STIMULANT USE, UNSPECIFIED WITH INTOXICATION, UNSPECIFIED                                |
| <b>F15.93</b>  | OTHER STIMULANT USE, UNSPECIFIED WITH WITHDRAWAL                                               |
| <b>F15.94</b>  | OTHER STIMULANT USE, UNSPECIFIED WITH STIMULANT-INDUCED MOOD DISORDER                          |
| <b>F15.950</b> | OTHER STIMULANT USE, UNSPECIFIED WITH STIMULANT-INDUCED PSYCHOTIC DISORDER WITH DELUSIONS      |
| <b>F15.951</b> | OTHER STIMULANT USE, UNSPECIFIED WITH STIMULANT-INDUCED PSYCHOTIC DISORDER WITH HALLUCINATIONS |
| <b>F15.959</b> | OTHER STIMULANT USE, UNSPECIFIED WITH STIMULANT-INDUCED PSYCHOTIC DISORDER, UNSPECIFIED        |
| <b>F15.980</b> | OTHER STIMULANT USE, UNSPECIFIED WITH STIMULANT-INDUCED ANXIETY DISORDER                       |
| <b>F15.981</b> | OTHER STIMULANT USE, UNSPECIFIED WITH STIMULANT-INDUCED SEXUAL DYSFUNCTION                     |
| <b>F15.982</b> | OTHER STIMULANT USE, UNSPECIFIED WITH STIMULANT-INDUCED SLEEP DISORDER                         |
| <b>F15.988</b> | OTHER STIMULANT USE, UNSPECIFIED WITH OTHER STIMULANT-INDUCED DISORDER                         |



|                |                                                                                     |
|----------------|-------------------------------------------------------------------------------------|
| <b>F15.99</b>  | OTHER STIMULANT USE, UNSPECIFIED WITH UNSPECIFIED STIMULANT-INDUCED DISORDER        |
| <b>F16.10</b>  | HALLUCINOGEN ABUSE, UNCOMPLICATED                                                   |
| <b>F16.120</b> | HALLUCINOGEN ABUSE WITH INTOXICATION, UNCOMPLICATED                                 |
| <b>F16.121</b> | HALLUCINOGEN ABUSE WITH INTOXICATION WITH DELIRIUM                                  |
| <b>F16.122</b> | HALLUCINOGEN ABUSE WITH INTOXICATION WITH PERCEPTUAL DISTURBANCE                    |
| <b>F16.129</b> | HALLUCINOGEN ABUSE WITH INTOXICATION, UNSPECIFIED                                   |
| <b>F16.14</b>  | HALLUCINOGEN ABUSE WITH HALLUCINOGEN-INDUCED MOOD DISORDER                          |
| <b>F16.150</b> | HALLUCINOGEN ABUSE WITH HALLUCINOGEN-INDUCED PSYCHOTIC DISORDER WITH DELUSIONS      |
| <b>F16.151</b> | HALLUCINOGEN ABUSE WITH HALLUCINOGEN-INDUCED PSYCHOTIC DISORDER WITH HALLUCINATIONS |
| <b>F16.159</b> | HALLUCINOGEN ABUSE WITH HALLUCINOGEN-INDUCED PSYCHOTIC DISORDER, UNSPECIFIED        |
| <b>F16.180</b> | HALLUCINOGEN ABUSE WITH HALLUCINOGEN-INDUCED ANXIETY DISORDER                       |
| <b>F16.183</b> | HALLUCINOGEN ABUSE WITH HALLUCINOGEN PERSISTING PERCEPTION DISORDER (FLASHBACKS)    |
| <b>F16.188</b> | HALLUCINOGEN ABUSE WITH OTHER HALLUCINOGEN-INDUCED DISORDER                         |
| <b>F16.19</b>  | HALLUCINOGEN ABUSE WITH UNSPECIFIED HALLUCINOGEN-INDUCED DISORDER                   |
| <b>F16.20</b>  | HALLUCINOGEN DEPENDENCE, UNCOMPLICATED                                              |
| <b>F16.21</b>  | HALLUCINOGEN DEPENDENCE, IN REMISSION                                               |
| <b>F16.220</b> | HALLUCINOGEN DEPENDENCE WITH INTOXICATION, UNCOMPLICATED                            |
| <b>F16.221</b> | HALLUCINOGEN DEPENDENCE WITH INTOXICATION WITH DELIRIUM                             |
| <b>F16.229</b> | HALLUCINOGEN DEPENDENCE WITH INTOXICATION, UNSPECIFIED                              |
| <b>F16.24</b>  | HALLUCINOGEN DEPENDENCE WITH HALLUCINOGEN-INDUCED MOOD DISORDER                     |
| <b>F16.250</b> | HALLUCINOGEN DEPENDENCE WITH HALLUCINOGEN-INDUCED PSYCHOTIC DISORDER WITH DELUSIONS |

|                |                                                                                                |
|----------------|------------------------------------------------------------------------------------------------|
| <b>F16.251</b> | HALLUCINOGEN DEPENDENCE WITH HALLUCINOGEN-INDUCED PSYCHOTIC DISORDER WITH HALLUCINATIONS       |
| <b>F16.259</b> | HALLUCINOGEN DEPENDENCE WITH HALLUCINOGEN-INDUCED PSYCHOTIC DISORDER, UNSPECIFIED              |
| <b>F16.280</b> | HALLUCINOGEN DEPENDENCE WITH HALLUCINOGEN-INDUCED ANXIETY DISORDER                             |
| <b>F16.283</b> | HALLUCINOGEN DEPENDENCE WITH HALLUCINOGEN PERSISTING PERCEPTION DISORDER (FLASHBACKS)          |
| <b>F16.288</b> | HALLUCINOGEN DEPENDENCE WITH OTHER HALLUCINOGEN-INDUCED DISORDER                               |
| <b>F16.29</b>  | HALLUCINOGEN DEPENDENCE WITH UNSPECIFIED HALLUCINOGEN-INDUCED DISORDER                         |
| <b>F16.90</b>  | HALLUCINOGEN USE, UNSPECIFIED, UNCOMPLICATED                                                   |
| <b>F16.920</b> | HALLUCINOGEN USE, UNSPECIFIED WITH INTOXICATION, UNCOMPLICATED                                 |
| <b>F16.921</b> | HALLUCINOGEN USE, UNSPECIFIED WITH INTOXICATION WITH DELIRIUM                                  |
| <b>F16.929</b> | HALLUCINOGEN USE, UNSPECIFIED WITH INTOXICATION, UNSPECIFIED                                   |
| <b>F16.94</b>  | HALLUCINOGEN USE, UNSPECIFIED WITH HALLUCINOGEN-INDUCED MOOD DISORDER                          |
| <b>F16.950</b> | HALLUCINOGEN USE, UNSPECIFIED WITH HALLUCINOGEN-INDUCED PSYCHOTIC DISORDER WITH DELUSIONS      |
| <b>F16.951</b> | HALLUCINOGEN USE, UNSPECIFIED WITH HALLUCINOGEN-INDUCED PSYCHOTIC DISORDER WITH HALLUCINATIONS |
| <b>F16.959</b> | HALLUCINOGEN USE, UNSPECIFIED WITH HALLUCINOGEN-INDUCED PSYCHOTIC DISORDER, UNSPECIFIED        |
| <b>F16.980</b> | HALLUCINOGEN USE, UNSPECIFIED WITH HALLUCINOGEN-INDUCED ANXIETY DISORDER                       |
| <b>F16.983</b> | HALLUCINOGEN USE, UNSPECIFIED WITH HALLUCINOGEN PERSISTING PERCEPTION DISORDER (FLASHBACKS)    |
| <b>F16.988</b> | HALLUCINOGEN USE, UNSPECIFIED WITH OTHER HALLUCINOGEN-INDUCED DISORDER                         |
| <b>F16.99</b>  | HALLUCINOGEN USE, UNSPECIFIED WITH UNSPECIFIED HALLUCINOGEN-INDUCED DISORDER                   |
| <b>F18.10</b>  | INHALANT ABUSE, UNCOMPLICATED                                                                  |

|                |                                                                                  |
|----------------|----------------------------------------------------------------------------------|
| <b>F18.120</b> | INHALANT ABUSE WITH INTOXICATION, UNCOMPLICATED                                  |
| <b>F18.121</b> | INHALANT ABUSE WITH INTOXICATION DELIRIUM                                        |
| <b>F18.129</b> | INHALANT ABUSE WITH INTOXICATION, UNSPECIFIED                                    |
| <b>F18.14</b>  | INHALANT ABUSE WITH INHALANT-INDUCED MOOD DISORDER                               |
| <b>F18.150</b> | INHALANT ABUSE WITH INHALANT-INDUCED PSYCHOTIC DISORDER WITH DELUSIONS           |
| <b>F18.151</b> | INHALANT ABUSE WITH INHALANT-INDUCED PSYCHOTIC DISORDER WITH HALLUCINATIONS      |
| <b>F18.159</b> | INHALANT ABUSE WITH INHALANT-INDUCED PSYCHOTIC DISORDER, UNSPECIFIED             |
| <b>F18.17</b>  | INHALANT ABUSE WITH INHALANT-INDUCED DEMENTIA                                    |
| <b>F18.180</b> | INHALANT ABUSE WITH INHALANT-INDUCED ANXIETY DISORDER                            |
| <b>F18.188</b> | INHALANT ABUSE WITH OTHER INHALANT-INDUCED DISORDER                              |
| <b>F18.19</b>  | INHALANT ABUSE WITH UNSPECIFIED INHALANT-INDUCED DISORDER                        |
| <b>F18.20</b>  | INHALANT DEPENDENCE, UNCOMPLICATED                                               |
| <b>F18.21</b>  | INHALANT DEPENDENCE, IN REMISSION                                                |
| <b>F18.220</b> | INHALANT DEPENDENCE WITH INTOXICATION, UNCOMPLICATED                             |
| <b>F18.221</b> | INHALANT DEPENDENCE WITH INTOXICATION DELIRIUM                                   |
| <b>F18.229</b> | INHALANT DEPENDENCE WITH INTOXICATION, UNSPECIFIED                               |
| <b>F18.24</b>  | INHALANT DEPENDENCE WITH INHALANT-INDUCED MOOD DISORDER                          |
| <b>F18.250</b> | INHALANT DEPENDENCE WITH INHALANT-INDUCED PSYCHOTIC DISORDER WITH DELUSIONS      |
| <b>F18.251</b> | INHALANT DEPENDENCE WITH INHALANT-INDUCED PSYCHOTIC DISORDER WITH HALLUCINATIONS |
| <b>F18.259</b> | INHALANT DEPENDENCE WITH INHALANT-INDUCED PSYCHOTIC DISORDER, UNSPECIFIED        |
| <b>F18.27</b>  | INHALANT DEPENDENCE WITH INHALANT-INDUCED DEMENTIA                               |
| <b>F18.280</b> | INHALANT DEPENDENCE WITH INHALANT-INDUCED ANXIETY DISORDER                       |
| <b>F18.288</b> | INHALANT DEPENDENCE WITH OTHER INHALANT-INDUCED DISORDER                         |

|                |                                                                                                               |
|----------------|---------------------------------------------------------------------------------------------------------------|
| <b>F18.29</b>  | INHALANT DEPENDENCE WITH UNSPECIFIED INHALANT-INDUCED DISORDER                                                |
| <b>F18.90</b>  | INHALANT USE, UNSPECIFIED, UNCOMPLICATED                                                                      |
| <b>F18.920</b> | INHALANT USE, UNSPECIFIED WITH INTOXICATION, UNCOMPLICATED                                                    |
| <b>F18.921</b> | INHALANT USE, UNSPECIFIED WITH INTOXICATION WITH DELIRIUM                                                     |
| <b>F18.929</b> | INHALANT USE, UNSPECIFIED WITH INTOXICATION, UNSPECIFIED                                                      |
| <b>F18.94</b>  | INHALANT USE, UNSPECIFIED WITH INHALANT-INDUCED MOOD DISORDER                                                 |
| <b>F18.950</b> | INHALANT USE, UNSPECIFIED WITH INHALANT-INDUCED PSYCHOTIC DISORDER WITH DELUSIONS                             |
| <b>F18.951</b> | INHALANT USE, UNSPECIFIED WITH INHALANT-INDUCED PSYCHOTIC DISORDER WITH HALLUCINATIONS                        |
| <b>F18.959</b> | INHALANT USE, UNSPECIFIED WITH INHALANT-INDUCED PSYCHOTIC DISORDER, UNSPECIFIED                               |
| <b>F18.97</b>  | INHALANT USE, UNSPECIFIED WITH INHALANT-INDUCED PERSISTING DEMENTIA                                           |
| <b>F18.980</b> | INHALANT USE, UNSPECIFIED WITH INHALANT-INDUCED ANXIETY DISORDER                                              |
| <b>F18.988</b> | INHALANT USE, UNSPECIFIED WITH OTHER INHALANT-INDUCED DISORDER                                                |
| <b>F18.99</b>  | INHALANT USE, UNSPECIFIED WITH UNSPECIFIED INHALANT-INDUCED DISORDER                                          |
| <b>F19.10</b>  | OTHER PSYCHOACTIVE SUBSTANCE ABUSE, UNCOMPLICATED                                                             |
| <b>F19.120</b> | OTHER PSYCHOACTIVE SUBSTANCE ABUSE WITH INTOXICATION, UNCOMPLICATED                                           |
| <b>F19.121</b> | OTHER PSYCHOACTIVE SUBSTANCE ABUSE WITH INTOXICATION DELIRIUM                                                 |
| <b>F19.122</b> | OTHER PSYCHOACTIVE SUBSTANCE ABUSE WITH INTOXICATION WITH PERCEPTUAL DISTURBANCES                             |
| <b>F19.129</b> | OTHER PSYCHOACTIVE SUBSTANCE ABUSE WITH INTOXICATION, UNSPECIFIED                                             |
| <b>F19.14</b>  | OTHER PSYCHOACTIVE SUBSTANCE ABUSE WITH PSYCHOACTIVE SUBSTANCE-INDUCED MOOD DISORDER                          |
| <b>F19.150</b> | OTHER PSYCHOACTIVE SUBSTANCE ABUSE WITH PSYCHOACTIVE SUBSTANCE-INDUCED PSYCHOTIC DISORDER WITH DELUSIONS      |
| <b>F19.151</b> | OTHER PSYCHOACTIVE SUBSTANCE ABUSE WITH PSYCHOACTIVE SUBSTANCE-INDUCED PSYCHOTIC DISORDER WITH HALLUCINATIONS |

|                |                                                                                                        |
|----------------|--------------------------------------------------------------------------------------------------------|
| <b>F19.159</b> | OTHER PSYCHOACTIVE SUBSTANCE ABUSE WITH PSYCHOACTIVE SUBSTANCE-INDUCED PSYCHOTIC DISORDER, UNSPECIFIED |
| <b>F19.16</b>  | OTHER PSYCHOACTIVE SUBSTANCE ABUSE WITH PSYCHOACTIVE SUBSTANCE-INDUCED PERSISTING AMNESTIC DISORDER    |
| <b>F19.17</b>  | OTHER PSYCHOACTIVE SUBSTANCE ABUSE WITH PSYCHOACTIVE SUBSTANCE-INDUCED PERSISTING DEMENTIA             |
| <b>F19.180</b> | OTHER PSYCHOACTIVE SUBSTANCE ABUSE WITH PSYCHOACTIVE SUBSTANCE-INDUCED ANXIETY DISORDER                |
| <b>F19.181</b> | OTHER PSYCHOACTIVE SUBSTANCE ABUSE WITH PSYCHOACTIVE SUBSTANCE-INDUCED SEXUAL DYSFUNCTION              |
| <b>F19.182</b> | OTHER PSYCHOACTIVE SUBSTANCE ABUSE WITH PSYCHOACTIVE SUBSTANCE-INDUCED SLEEP DISORDER                  |
| <b>F19.188</b> | OTHER PSYCHOACTIVE SUBSTANCE ABUSE WITH OTHER PSYCHOACTIVE SUBSTANCE-INDUCED DISORDER                  |
| <b>F19.19</b>  | OTHER PSYCHOACTIVE SUBSTANCE ABUSE WITH UNSPECIFIED PSYCHOACTIVE SUBSTANCE-INDUCED DISORDER            |
| <b>F19.20</b>  | OTHER PSYCHOACTIVE SUBSTANCE DEPENDENCE, UNCOMPLICATED                                                 |
| <b>F19.21</b>  | OTHER PSYCHOACTIVE SUBSTANCE DEPENDENCE, IN REMISSION                                                  |
| <b>F19.220</b> | OTHER PSYCHOACTIVE SUBSTANCE DEPENDENCE WITH INTOXICATION, UNCOMPLICATED                               |
| <b>F19.221</b> | OTHER PSYCHOACTIVE SUBSTANCE DEPENDENCE WITH INTOXICATION DELIRIUM                                     |
| <b>F19.222</b> | OTHER PSYCHOACTIVE SUBSTANCE DEPENDENCE WITH INTOXICATION WITH PERCEPTUAL DISTURBANCE                  |
| <b>F19.229</b> | OTHER PSYCHOACTIVE SUBSTANCE DEPENDENCE WITH INTOXICATION, UNSPECIFIED                                 |
| <b>F19.230</b> | OTHER PSYCHOACTIVE SUBSTANCE DEPENDENCE WITH WITHDRAWAL, UNCOMPLICATED                                 |
| <b>F19.231</b> | OTHER PSYCHOACTIVE SUBSTANCE DEPENDENCE WITH WITHDRAWAL DELIRIUM                                       |
| <b>F19.232</b> | OTHER PSYCHOACTIVE SUBSTANCE DEPENDENCE WITH WITHDRAWAL WITH PERCEPTUAL DISTURBANCE                    |
| <b>F19.239</b> | OTHER PSYCHOACTIVE SUBSTANCE DEPENDENCE WITH WITHDRAWAL, UNSPECIFIED                                   |

|                |                                                                                                                    |
|----------------|--------------------------------------------------------------------------------------------------------------------|
| <b>F19.24</b>  | OTHER PSYCHOACTIVE SUBSTANCE DEPENDENCE WITH PSYCHOACTIVE SUBSTANCE-INDUCED MOOD DISORDER                          |
| <b>F19.250</b> | OTHER PSYCHOACTIVE SUBSTANCE DEPENDENCE WITH PSYCHOACTIVE SUBSTANCE-INDUCED PSYCHOTIC DISORDER WITH DELUSIONS      |
| <b>F19.251</b> | OTHER PSYCHOACTIVE SUBSTANCE DEPENDENCE WITH PSYCHOACTIVE SUBSTANCE-INDUCED PSYCHOTIC DISORDER WITH HALLUCINATIONS |
| <b>F19.259</b> | OTHER PSYCHOACTIVE SUBSTANCE DEPENDENCE WITH PSYCHOACTIVE SUBSTANCE-INDUCED PSYCHOTIC DISORDER, UNSPECIFIED        |
| <b>F19.26</b>  | OTHER PSYCHOACTIVE SUBSTANCE DEPENDENCE WITH PSYCHOACTIVE SUBSTANCE-INDUCED PERSISTING AMNESTIC DISORDER           |
| <b>F19.27</b>  | OTHER PSYCHOACTIVE SUBSTANCE DEPENDENCE WITH PSYCHOACTIVE SUBSTANCE-INDUCED PERSISTING DEMENTIA                    |
| <b>F19.280</b> | OTHER PSYCHOACTIVE SUBSTANCE DEPENDENCE WITH PSYCHOACTIVE SUBSTANCE-INDUCED ANXIETY DISORDER                       |
| <b>F19.281</b> | OTHER PSYCHOACTIVE SUBSTANCE DEPENDENCE WITH PSYCHOACTIVE SUBSTANCE-INDUCED SEXUAL DYSFUNCTION                     |
| <b>F19.282</b> | OTHER PSYCHOACTIVE SUBSTANCE DEPENDENCE WITH PSYCHOACTIVE SUBSTANCE-INDUCED SLEEP DISORDER                         |
| <b>F19.288</b> | OTHER PSYCHOACTIVE SUBSTANCE DEPENDENCE WITH OTHER PSYCHOACTIVE SUBSTANCE-INDUCED DISORDER                         |
| <b>F19.29</b>  | OTHER PSYCHOACTIVE SUBSTANCE DEPENDENCE WITH UNSPECIFIED PSYCHOACTIVE SUBSTANCE-INDUCED DISORDER                   |
| <b>F19.90</b>  | OTHER PSYCHOACTIVE SUBSTANCE USE, UNSPECIFIED, UNCOMPLICATED                                                       |
| <b>F19.920</b> | OTHER PSYCHOACTIVE SUBSTANCE USE, UNSPECIFIED WITH INTOXICATION, UNCOMPLICATED                                     |
| <b>F19.921</b> | OTHER PSYCHOACTIVE SUBSTANCE USE, UNSPECIFIED WITH INTOXICATION WITH DELIRIUM                                      |
| <b>F19.922</b> | OTHER PSYCHOACTIVE SUBSTANCE USE, UNSPECIFIED WITH INTOXICATION WITH PERCEPTUAL DISTURBANCE                        |
| <b>F19.929</b> | OTHER PSYCHOACTIVE SUBSTANCE USE, UNSPECIFIED WITH INTOXICATION, UNSPECIFIED                                       |
| <b>F19.930</b> | OTHER PSYCHOACTIVE SUBSTANCE USE, UNSPECIFIED WITH WITHDRAWAL, UNCOMPLICATED                                       |

|                |                                                                                                                          |
|----------------|--------------------------------------------------------------------------------------------------------------------------|
| <b>F19.931</b> | OTHER PSYCHOACTIVE SUBSTANCE USE, UNSPECIFIED WITH WITHDRAWAL DELIRIUM                                                   |
| <b>F19.932</b> | OTHER PSYCHOACTIVE SUBSTANCE USE, UNSPECIFIED WITH WITHDRAWAL WITH PERCEPTUAL DISTURBANCE                                |
| <b>F19.939</b> | OTHER PSYCHOACTIVE SUBSTANCE USE, UNSPECIFIED WITH WITHDRAWAL, UNSPECIFIED                                               |
| <b>F19.94</b>  | OTHER PSYCHOACTIVE SUBSTANCE USE, UNSPECIFIED WITH PSYCHOACTIVE SUBSTANCE-INDUCED MOOD DISORDER                          |
| <b>F19.950</b> | OTHER PSYCHOACTIVE SUBSTANCE USE, UNSPECIFIED WITH PSYCHOACTIVE SUBSTANCE-INDUCED PSYCHOTIC DISORDER WITH DELUSIONS      |
| <b>F19.951</b> | OTHER PSYCHOACTIVE SUBSTANCE USE, UNSPECIFIED WITH PSYCHOACTIVE SUBSTANCE-INDUCED PSYCHOTIC DISORDER WITH HALLUCINATIONS |
| <b>F19.959</b> | OTHER PSYCHOACTIVE SUBSTANCE USE, UNSPECIFIED WITH PSYCHOACTIVE SUBSTANCE-INDUCED PSYCHOTIC DISORDER, UNSPECIFIED        |
| <b>F19.96</b>  | OTHER PSYCHOACTIVE SUBSTANCE USE, UNSPECIFIED WITH PSYCHOACTIVE SUBSTANCE-INDUCED PERSISTING AMNESTIC DISORDER           |
| <b>F19.97</b>  | OTHER PSYCHOACTIVE SUBSTANCE USE, UNSPECIFIED WITH PSYCHOACTIVE SUBSTANCE-INDUCED PERSISTING DEMENTIA                    |
| <b>F19.980</b> | OTHER PSYCHOACTIVE SUBSTANCE USE, UNSPECIFIED WITH PSYCHOACTIVE SUBSTANCE-INDUCED ANXIETY DISORDER                       |
| <b>F19.981</b> | OTHER PSYCHOACTIVE SUBSTANCE USE, UNSPECIFIED WITH PSYCHOACTIVE SUBSTANCE-INDUCED SEXUAL DYSFUNCTION                     |
| <b>F19.982</b> | OTHER PSYCHOACTIVE SUBSTANCE USE, UNSPECIFIED WITH PSYCHOACTIVE SUBSTANCE-INDUCED SLEEP DISORDER                         |
| <b>F19.988</b> | OTHER PSYCHOACTIVE SUBSTANCE USE, UNSPECIFIED WITH OTHER PSYCHOACTIVE SUBSTANCE-INDUCED DISORDER                         |
| <b>F19.99</b>  | OTHER PSYCHOACTIVE SUBSTANCE USE, UNSPECIFIED WITH UNSPECIFIED PSYCHOACTIVE SUBSTANCE-INDUCED DISORDER                   |
| <b>F20.0</b>   | PARANOID SCHIZOPHRENIA                                                                                                   |
| <b>F20.1</b>   | DISORGANIZED SCHIZOPHRENIA                                                                                               |
| <b>F20.2</b>   | CATATONIC SCHIZOPHRENIA                                                                                                  |
| <b>F20.3</b>   | UNDIFFERENTIATED SCHIZOPHRENIA                                                                                           |

|               |                                                                                  |
|---------------|----------------------------------------------------------------------------------|
| <b>F20.5</b>  | RESIDUAL SCHIZOPHRENIA                                                           |
| <b>F20.81</b> | SCHIZOPHRENIFORM DISORDER                                                        |
| <b>F20.89</b> | OTHER SCHIZOPHRENIA                                                              |
| <b>F20.9</b>  | SCHIZOPHRENIA, UNSPECIFIED                                                       |
| <b>F21.</b>   | SCHIZOTYPAL DISORDER                                                             |
| <b>F22.</b>   | DELUSIONAL DISORDERS                                                             |
| <b>F23.</b>   | BRIEF PSYCHOTIC DISORDER                                                         |
| <b>F24.</b>   | SHARED PSYCHOTIC DISORDER                                                        |
| <b>F25.0</b>  | SCHIZOAFFECTIVE DISORDER, BIPOLAR TYPE                                           |
| <b>F25.1</b>  | SCHIZOAFFECTIVE DISORDER, DEPRESSIVE TYPE                                        |
| <b>F25.8</b>  | OTHER SCHIZOAFFECTIVE DISORDERS                                                  |
| <b>F25.9</b>  | SCHIZOAFFECTIVE DISORDER, UNSPECIFIED                                            |
| <b>F28.</b>   | OTHER PSYCHOTIC DISORDER NOT DUE TO A SUBSTANCE OR KNOWN PHYSIOLOGICAL CONDITION |
| <b>F29.</b>   | UNSPECIFIED PSYCHOSIS NOT DUE TO A SUBSTANCE OR KNOWN PHYSIOLOGICAL CONDITION    |
| <b>F30.10</b> | MANIC EPISODE WITHOUT PSYCHOTIC SYMPTOMS, UNSPECIFIED                            |
| <b>F30.11</b> | MANIC EPISODE WITHOUT PSYCHOTIC SYMPTOMS, MILD                                   |
| <b>F30.12</b> | MANIC EPISODE WITHOUT PSYCHOTIC SYMPTOMS, MODERATE                               |
| <b>F30.13</b> | MANIC EPISODE, SEVERE, WITHOUT PSYCHOTIC SYMPTOMS                                |
| <b>F30.2</b>  | MANIC EPISODE, SEVERE WITH PSYCHOTIC SYMPTOMS                                    |
| <b>F30.3</b>  | MANIC EPISODE IN PARTIAL REMISSION                                               |
| <b>F30.4</b>  | MANIC EPISODE IN FULL REMISSION                                                  |
| <b>F30.8</b>  | OTHER MANIC EPISODES                                                             |
| <b>F30.9</b>  | MANIC EPISODE, UNSPECIFIED                                                       |
| <b>F31.0</b>  | BIPOLAR DISORDER, CURRENT EPISODE HYPOMANIC                                      |
| <b>F31.10</b> | BIPOLAR DISORDER, CURRENT EPISODE MANIC WITHOUT PSYCHOTIC FEATURES, UNSPECIFIED  |



|               |                                                                                     |
|---------------|-------------------------------------------------------------------------------------|
| <b>F31.11</b> | BIPOLAR DISORDER, CURRENT EPISODE MANIC WITHOUT PSYCHOTIC FEATURES, MILD            |
| <b>F31.12</b> | BIPOLAR DISORDER, CURRENT EPISODE MANIC WITHOUT PSYCHOTIC FEATURES, MODERATE        |
| <b>F31.13</b> | BIPOLAR DISORDER, CURRENT EPISODE MANIC WITHOUT PSYCHOTIC FEATURES, SEVERE          |
| <b>F31.2</b>  | BIPOLAR DISORDER, CURRENT EPISODE MANIC SEVERE WITH PSYCHOTIC FEATURES              |
| <b>F31.30</b> | BIPOLAR DISORDER, CURRENT EPISODE DEPRESSED, MILD OR MODERATE SEVERITY, UNSPECIFIED |
| <b>F31.31</b> | BIPOLAR DISORDER, CURRENT EPISODE DEPRESSED, MILD                                   |
| <b>F31.32</b> | BIPOLAR DISORDER, CURRENT EPISODE DEPRESSED, MODERATE                               |
| <b>F31.4</b>  | BIPOLAR DISORDER, CURRENT EPISODE DEPRESSED, SEVERE, WITHOUT PSYCHOTIC FEATURES     |
| <b>F31.5</b>  | BIPOLAR DISORDER, CURRENT EPISODE DEPRESSED, SEVERE, WITH PSYCHOTIC FEATURES        |
| <b>F31.60</b> | BIPOLAR DISORDER, CURRENT EPISODE MIXED, UNSPECIFIED                                |
| <b>F31.61</b> | BIPOLAR DISORDER, CURRENT EPISODE MIXED, MILD                                       |
| <b>F31.62</b> | BIPOLAR DISORDER, CURRENT EPISODE MIXED, MODERATE                                   |
| <b>F31.63</b> | BIPOLAR DISORDER, CURRENT EPISODE MIXED, SEVERE, WITHOUT PSYCHOTIC FEATURES         |
| <b>F31.64</b> | BIPOLAR DISORDER, CURRENT EPISODE MIXED, SEVERE, WITH PSYCHOTIC FEATURES            |
| <b>F31.70</b> | BIPOLAR DISORDER, CURRENTLY IN REMISSION, MOST RECENT EPISODE UNSPECIFIED           |
| <b>F31.71</b> | BIPOLAR DISORDER, IN PARTIAL REMISSION, MOST RECENT EPISODE HYPOMANIC               |
| <b>F31.72</b> | BIPOLAR DISORDER, IN FULL REMISSION, MOST RECENT EPISODE HYPOMANIC                  |
| <b>F31.73</b> | BIPOLAR DISORDER, IN PARTIAL REMISSION, MOST RECENT EPISODE MANIC                   |
| <b>F31.74</b> | BIPOLAR DISORDER, IN FULL REMISSION, MOST RECENT EPISODE MANIC                      |
| <b>F31.75</b> | BIPOLAR DISORDER, IN PARTIAL REMISSION, MOST RECENT EPISODE DEPRESSED               |

|               |                                                                              |
|---------------|------------------------------------------------------------------------------|
| <b>F31.76</b> | BIPOLAR DISORDER, IN FULL REMISSION, MOST RECENT EPISODE DEPRESSED           |
| <b>F31.77</b> | BIPOLAR DISORDER, IN PARTIAL REMISSION, MOST RECENT EPISODE MIXED            |
| <b>F31.78</b> | BIPOLAR DISORDER, IN FULL REMISSION, MOST RECENT EPISODE MIXED               |
| <b>F31.81</b> | BIPOLAR II DISORDER                                                          |
| <b>F31.89</b> | OTHER BIPOLAR DISORDER                                                       |
| <b>F31.9</b>  | BIPOLAR DISORDER, UNSPECIFIED                                                |
| <b>F32.0</b>  | MAJOR DEPRESSIVE DISORDER, SINGLE EPISODE, MILD                              |
| <b>F32.1</b>  | MAJOR DEPRESSIVE DISORDER, SINGLE EPISODE, MODERATE                          |
| <b>F32.2</b>  | MAJOR DEPRESSIVE DISORDER, SINGLE EPISODE, SEVERE WITHOUT PSYCHOTIC FEATURES |
| <b>F32.3</b>  | MAJOR DEPRESSIVE DISORDER, SINGLE EPISODE, SEVERE WITH PSYCHOTIC FEATURES    |
| <b>F32.4</b>  | MAJOR DEPRESSIVE DISORDER, SINGLE EPISODE, IN PARTIAL REMISSION              |
| <b>F32.5</b>  | MAJOR DEPRESSIVE DISORDER, SINGLE EPISODE, IN FULL REMISSION                 |
| <b>F32.8</b>  | OTHER DEPRESSIVE EPISODES                                                    |
| <b>F32.9</b>  | MAJOR DEPRESSIVE DISORDER, SINGLE EPISODE, UNSPECIFIED                       |
| <b>F33.0</b>  | MAJOR DEPRESSIVE DISORDER, RECURRENT, MILD                                   |
| <b>F33.1</b>  | MAJOR DEPRESSIVE DISORDER, RECURRENT, MODERATE                               |
| <b>F33.2</b>  | MAJOR DEPRESSIVE DISORDER, RECURRENT SEVERE WITHOUT PSYCHOTIC FEATURES       |
| <b>F33.3</b>  | MAJOR DEPRESSIVE DISORDER, RECURRENT, SEVERE WITH PSYCHOTIC SYMPTOMS         |
| <b>F33.40</b> | MAJOR DEPRESSIVE DISORDER, RECURRENT, IN REMISSION, UNSPECIFIED              |
| <b>F33.41</b> | MAJOR DEPRESSIVE DISORDER, RECURRENT, IN PARTIAL REMISSION                   |
| <b>F33.42</b> | MAJOR DEPRESSIVE DISORDER, RECURRENT, IN FULL REMISSION                      |
| <b>F33.8</b>  | OTHER RECURRENT DEPRESSIVE DISORDERS                                         |
| <b>F33.9</b>  | MAJOR DEPRESSIVE DISORDER, RECURRENT, UNSPECIFIED                            |
| <b>F34.0</b>  | CYCLOTHYMIC DISORDER                                                         |

|                |                                                   |
|----------------|---------------------------------------------------|
| <b>F34.1</b>   | DYSTHYMIC DISORDER                                |
| <b>F34.8</b>   | OTHER PERSISTENT MOOD [AFFECTIVE] DISORDERS       |
| <b>F34.9</b>   | PERSISTENT MOOD [AFFECTIVE] DISORDER, UNSPECIFIED |
| <b>F39.</b>    | UNSPECIFIED MOOD [AFFECTIVE] DISORDER             |
| <b>F40.00</b>  | AGORAPHOBIA, UNSPECIFIED                          |
| <b>F40.01</b>  | AGORAPHOBIA WITH PANIC DISORDER                   |
| <b>F40.02</b>  | AGORAPHOBIA WITHOUT PANIC DISORDER                |
| <b>F40.10</b>  | SOCIAL PHOBIA, UNSPECIFIED                        |
| <b>F40.11</b>  | SOCIAL PHOBIA, GENERALIZED                        |
| <b>F40.210</b> | ARACHNOPHOBIA                                     |
| <b>F40.218</b> | OTHER ANIMAL TYPE PHOBIA                          |
| <b>F40.220</b> | FEAR OF THUNDERSTORMS                             |
| <b>F40.228</b> | OTHER NATURAL ENVIRONMENT TYPE PHOBIA             |
| <b>F40.230</b> | FEAR OF BLOOD                                     |
| <b>F40.231</b> | FEAR OF INJECTIONS AND TRANSFUSIONS               |
| <b>F40.232</b> | FEAR OF OTHER MEDICAL CARE                        |
| <b>F40.233</b> | FEAR OF INJURY                                    |
| <b>F40.240</b> | CLAUSTROPHOBIA                                    |
| <b>F40.241</b> | ACROPHOBIA                                        |
| <b>F40.242</b> | FEAR OF BRIDGES                                   |
| <b>F40.243</b> | FEAR OF FLYING                                    |
| <b>F40.248</b> | OTHER SITUATIONAL TYPE PHOBIA                     |
| <b>F40.290</b> | ANDROPHOBIA                                       |
| <b>F40.291</b> | GYNEPHOBIA                                        |
| <b>F40.298</b> | OTHER SPECIFIED PHOBIA                            |
| <b>F40.8</b>   | OTHER PHOBIC ANXIETY DISORDERS                    |
| <b>F40.9</b>   | PHOBIC ANXIETY DISORDER, UNSPECIFIED              |

|               |                                                                    |
|---------------|--------------------------------------------------------------------|
| <b>F41.0</b>  | PANIC DISORDER [EPISODIC PAROXYSMAL ANXIETY] WITHOUT AGORAPHOBIA   |
| <b>F41.1</b>  | GENERALIZED ANXIETY DISORDER                                       |
| <b>F41.3</b>  | OTHER MIXED ANXIETY DISORDERS                                      |
| <b>F41.8</b>  | OTHER SPECIFIED ANXIETY DISORDERS                                  |
| <b>F41.9</b>  | ANXIETY DISORDER, UNSPECIFIED                                      |
| <b>F42.</b>   | OBSESSIVE-COMPULSIVE DISORDER                                      |
| <b>F43.0</b>  | ACUTE STRESS REACTION                                              |
| <b>F43.10</b> | POST-TRAUMATIC STRESS DISORDER, UNSPECIFIED                        |
| <b>F43.11</b> | POST-TRAUMATIC STRESS DISORDER, ACUTE                              |
| <b>F43.12</b> | POST-TRAUMATIC STRESS DISORDER, CHRONIC                            |
| <b>F43.20</b> | ADJUSTMENT DISORDER, UNSPECIFIED                                   |
| <b>F43.21</b> | ADJUSTMENT DISORDER WITH DEPRESSED MOOD                            |
| <b>F43.22</b> | ADJUSTMENT DISORDER WITH ANXIETY                                   |
| <b>F43.23</b> | ADJUSTMENT DISORDER WITH MIXED ANXIETY AND DEPRESSED MOOD          |
| <b>F43.24</b> | ADJUSTMENT DISORDER WITH DISTURBANCE OF CONDUCT                    |
| <b>F43.25</b> | ADJUSTMENT DISORDER WITH MIXED DISTURBANCE OF EMOTIONS AND CONDUCT |
| <b>F43.29</b> | ADJUSTMENT DISORDER WITH OTHER SYMPTOMS                            |
| <b>F43.8</b>  | OTHER REACTIONS TO SEVERE STRESS                                   |
| <b>F43.9</b>  | REACTION TO SEVERE STRESS, UNSPECIFIED                             |
| <b>F44.0</b>  | DISSOCIATIVE AMNESIA                                               |
| <b>F44.1</b>  | DISSOCIATIVE FUGUE                                                 |
| <b>F44.2</b>  | DISSOCIATIVE STUPOR                                                |
| <b>F44.4</b>  | CONVERSION DISORDER WITH MOTOR SYMPTOM OR DEFICIT                  |
| <b>F44.5</b>  | CONVERSION DISORDER WITH SEIZURES OR CONVULSIONS                   |
| <b>F44.6</b>  | CONVERSION DISORDER WITH SENSORY SYMPTOM OR DEFICIT                |
| <b>F44.7</b>  | CONVERSION DISORDER WITH MIXED SYMPTOM PRESENTATION                |

|               |                                                   |
|---------------|---------------------------------------------------|
| <b>F44.81</b> | DISSOCIATIVE IDENTITY DISORDER                    |
| <b>F44.89</b> | OTHER DISSOCIATIVE AND CONVERSION DISORDERS       |
| <b>F44.9</b>  | DISSOCIATIVE AND CONVERSION DISORDER, UNSPECIFIED |
| <b>F45.0</b>  | SOMATIZATION DISORDER                             |
| <b>F45.1</b>  | UNDIFFERENTIATED SOMATOFORM DISORDER              |
| <b>F45.20</b> | HYPOCHONDRIACAL DISORDER, UNSPECIFIED             |
| <b>F45.21</b> | HYPOCHONDRIASIS                                   |
| <b>F45.22</b> | BODY DYSMORPHIC DISORDER                          |
| <b>F45.29</b> | OTHER HYPOCHONDRIACAL DISORDERS                   |
| <b>F45.8</b>  | OTHER SOMATOFORM DISORDERS                        |
| <b>F45.9</b>  | SOMATOFORM DISORDER, UNSPECIFIED                  |
| <b>F48.1</b>  | DEPERSONALIZATION-DEREALIZATION SYNDROME          |
| <b>F50.00</b> | ANOREXIA NERVOSA, UNSPECIFIED                     |
| <b>F50.01</b> | ANOREXIA NERVOSA, RESTRICTING TYPE                |
| <b>F50.02</b> | ANOREXIA NERVOSA, BINGE EATING/PURGING TYPE       |
| <b>F50.2</b>  | BULIMIA NERVOSA                                   |
| <b>F50.8</b>  | OTHER EATING DISORDERS                            |
| <b>F50.9</b>  | EATING DISORDER, UNSPECIFIED                      |
| <b>F53.</b>   | PUERPERAL PSYCHOSIS                               |
| <b>F60.0</b>  | PARANOID PERSONALITY DISORDER                     |
| <b>F60.1</b>  | SCHIZOID PERSONALITY DISORDER                     |
| <b>F60.2</b>  | ANTISOCIAL PERSONALITY DISORDER                   |
| <b>F60.3</b>  | BORDERLINE PERSONALITY DISORDER                   |
| <b>F60.4</b>  | HISTRIONIC PERSONALITY DISORDER                   |
| <b>F60.5</b>  | OBSESSIVE-COMPULSIVE PERSONALITY DISORDER         |
| <b>F60.6</b>  | AVOIDANT PERSONALITY DISORDER                     |
| <b>F60.7</b>  | DEPENDENT PERSONALITY DISORDER                    |

|               |                                                                                 |
|---------------|---------------------------------------------------------------------------------|
| <b>F60.81</b> | NARCISSISTIC PERSONALITY DISORDER                                               |
| <b>F60.89</b> | OTHER SPECIFIC PERSONALITY DISORDERS                                            |
| <b>F60.9</b>  | PERSONALITY DISORDER, UNSPECIFIED                                               |
| <b>F63.0</b>  | PATHOLOGICAL GAMBLING                                                           |
| <b>F63.1</b>  | PYROMANIA                                                                       |
| <b>F63.2</b>  | KLEPTOMANIA                                                                     |
| <b>F63.3</b>  | TRICHOTILLOMANIA                                                                |
| <b>F63.81</b> | INTERMITTENT EXPLOSIVE DISORDER                                                 |
| <b>F63.89</b> | OTHER IMPULSE DISORDERS                                                         |
| <b>F63.9</b>  | IMPULSE DISORDER, UNSPECIFIED                                                   |
| <b>F68.10</b> | FACTITIOUS DISORDER, UNSPECIFIED                                                |
| <b>F68.11</b> | FACTITIOUS DISORDER WITH PREDOMINANTLY PSYCHOLOGICAL SIGNS AND SYMPTOMS         |
| <b>F68.12</b> | FACTITIOUS DISORDER WITH PREDOMINANTLY PHYSICAL SIGNS AND SYMPTOMS              |
| <b>F68.13</b> | FACTITIOUS DISORDER WITH COMBINED PSYCHOLOGICAL AND PHYSICAL SIGNS AND SYMPTOMS |
| <b>F68.8</b>  | OTHER SPECIFIED DISORDERS OF ADULT PERSONALITY AND BEHAVIOR                     |
| <b>F69.</b>   | UNSPECIFIED DISORDER OF ADULT PERSONALITY AND BEHAVIOR                          |
| <b>F90.0</b>  | ATTENTION-DEFICIT HYPERACTIVITY DISORDER, PREDOMINANTLY INATTENTIVE TYPE        |
| <b>F90.1</b>  | ATTENTION-DEFICIT HYPERACTIVITY DISORDER, PREDOMINANTLY HYPERACTIVE TYPE        |
| <b>F90.2</b>  | ATTENTION-DEFICIT HYPERACTIVITY DISORDER, COMBINED TYPE                         |
| <b>F90.8</b>  | ATTENTION-DEFICIT HYPERACTIVITY DISORDER, OTHER TYPE                            |
| <b>F90.9</b>  | ATTENTION-DEFICIT HYPERACTIVITY DISORDER, UNSPECIFIED TYPE                      |
| <b>F91.0</b>  | CONDUCT DISORDER CONFINED TO FAMILY CONTEXT                                     |
| <b>F91.1</b>  | CONDUCT DISORDER, CHILDHOOD-ONSET TYPE                                          |
| <b>F91.2</b>  | CONDUCT DISORDER, ADOLESCENT-ONSET TYPE                                         |

|              |                                                  |
|--------------|--------------------------------------------------|
| <b>F91.3</b> | OPPOSITIONAL DEFIANT DISORDER                    |
| <b>F91.8</b> | OTHER CONDUCT DISORDERS                          |
| <b>F91.9</b> | CONDUCT DISORDER, UNSPECIFIED                    |
| <b>R45.7</b> | STATE OF EMOTIONAL SHOCK AND STRESS, UNSPECIFIED |

**Group 2 (higher intensity follow up):** Any acute or intensive care discharge from a mental health inpatient treating specialty (i.e., bedsection), regardless of principal discharge diagnosis, and that does not meet Criteria for Group 3.

| <b>Code</b> | <b>Treating Specialty Code Description</b> | <b>Code</b> | <b>Treating Specialty Code Description</b> |
|-------------|--------------------------------------------|-------------|--------------------------------------------|
| <b>33</b>   | zGEM PSYCHIATRIC BEDS                      | <b>84</b>   | zSUBSTANCE ABUSE INTERMED CARE             |
| <b>33</b>   | GEM PSYCHIATRIC BEDS                       | <b>84</b>   | SUBSTANCE ABUSE INTERMED CARE              |
| <b>70</b>   | ACUTE PSYCHIATRY (<45 DAYS)                | <b>89</b>   | STAR I, II & III                           |
| <b>70</b>   | zACUTE PSYCHIATRY (<45 DAYS)               | <b>90</b>   | zSUBST ABUSE STAR I, II & III              |
| <b>72</b>   | ZZALCOHOL DEPENDENCE TRMT UNIT             | <b>90</b>   | SUBST ABUSE STAR I, II & III               |
| <b>72</b>   | ALCOHOL DEPENDENCE TRMT UNIT               | <b>91</b>   | EVAL/BRF TRMT PTSD UNIT(EBTPU)             |
| <b>73</b>   | ZZDRUG DEPENDENCE TRMT UNIT                | <b>91</b>   | zEVAL/BRF TRMT PTSD UNIT(EB                |
| <b>73</b>   | DRUG DEPENDENCE TRMT UNIT                  | <b>92</b>   | GEN INTERMEDIATE PSYCH                     |
| <b>74</b>   | SUBSTANCE ABUSE TRMT UNIT                  | <b>93</b>   | HIGH INTENSITY GEN INPT                    |
| <b>74</b>   | zSUBSTANCE ABUSE TRMT UNIT                 | <b>93</b>   | PSYCHIATRY                                 |
| <b>76</b>   | PSYCHIATRIC MENTALLY INFIRM                | <b>93</b>   | HIGH INTENSITY GEN PSYCH INPAT             |
| <b>79</b>   | SIPU (SPEC INPT PTSD UNIT)                 | <b>94</b>   | PSYCHIATRIC OBSERVATION                    |
| <b>79</b>   | zSIPU (SPEC INPT PTSD UNIT)                |             |                                            |

**Group 3 (requires 4 MH visits in 30 days after discharge):** Any discharge that meets either Criteria 3a or 3b:

*Criteria 3a:* Veterans with at least one bed day of care in any Inpatient, Residential or Domiciliary treating specialty listed under Denominator Inclusion Criteria for Group 1 or Group 2, who have an active high risk flag for suicide at time of discharge.

*Criteria 3b:* Veterans who received any ICD-10 diagnosis for Suicide Related Symptoms and Behaviors, or any diagnosis for an initial treatment episode of Intentional Self-Harm, when that discharge diagnosis was the result of a least one bed day of care in any Inpatient, Residential, Domiciliary treating specialty:

*ICD-10 diagnosis codes suicide related symptoms or behaviors*

| <b>ICD 10 Diagnosis Code</b> | <b>Code Description</b> |
|------------------------------|-------------------------|
| <b>R45.851</b>               | SUICIDAL IDEATIONS      |
| <b>T14.91</b>                | SUICIDE ATTEMPT         |

*ICD-10 diagnosis codes overdoses and poisonings involving intentional self-harm (T36.0 to T65.9) when coded as an initial treatment encounter for intentional self-harm:*

| <b>ICD 10 Diagnosis Code</b> | <b>Code Description</b>                                            |
|------------------------------|--------------------------------------------------------------------|
| <b>T36.0X2A</b>              | POISONING BY PENICILLINS, INTENTIONAL SELF-HARM, INITIAL ENCOUNTER |



|                 |                                                                                                                    |
|-----------------|--------------------------------------------------------------------------------------------------------------------|
| <b>T36.1X2A</b> | POISONING BY CEPHALOSPORINS AND OTHER BETA-LACTAM ANTIBIOTICS, INTENTIONAL SELF-HARM, INITIAL ENCOUNTER            |
| <b>T36.2X2A</b> | POISONING BY CHLORAMPHENICOL GROUP, INTENTIONAL SELF-HARM, INITIAL ENCOUNTER                                       |
| <b>T36.3X2A</b> | POISONING BY MACROLIDES, INTENTIONAL SELF-HARM, INITIAL ENCOUNTER                                                  |
| <b>T36.4X2A</b> | POISONING BY TETRACYCLINES, INTENTIONAL SELF-HARM, INITIAL ENCOUNTER                                               |
| <b>T36.5X2A</b> | POISONING BY AMINOGLYCOSIDES, INTENTIONAL SELF-HARM, INITIAL ENCOUNTER                                             |
| <b>T36.6X2A</b> | POISONING BY RIFAMPICINS, INTENTIONAL SELF-HARM, INITIAL ENCOUNTER                                                 |
| <b>T36.7X2A</b> | POISONING BY ANTIFUNGAL ANTIBIOTICS, SYSTEMICALLY USED, INTENTIONAL SELF-HARM, INITIAL ENCOUNTER                   |
| <b>T36.8X2A</b> | POISONING BY OTHER SYSTEMIC ANTIBIOTICS, INTENTIONAL SELF-HARM, INITIAL ENCOUNTER                                  |
| <b>T37.0X2A</b> | POISONING BY SULFONAMIDES, INTENTIONAL SELF-HARM, INITIAL ENCOUNTER                                                |
| <b>T37.1X2A</b> | POISONING BY ANTIMYCOBACTERIAL DRUGS, INTENTIONAL SELF-HARM, INITIAL ENCOUNTER                                     |
| <b>T37.2X2A</b> | POISONING BY ANTIMALARIALS AND DRUGS ACTING ON OTHER BLOOD PROTOZOA, INTENTIONAL SELF-HARM, INITIAL ENCOUNTER      |
| <b>T37.3X2A</b> | POISONING BY OTHER ANTIPROTOZOAL DRUGS, INTENTIONAL SELF-HARM, INITIAL ENCOUNTER                                   |
| <b>T37.4X2A</b> | POISONING BY ANTHELMINTHICS, INTENTIONAL SELF-HARM, INITIAL ENCOUNTER                                              |
| <b>T37.5X2A</b> | POISONING BY ANTIVIRAL DRUGS, INTENTIONAL SELF-HARM, INITIAL ENCOUNTER                                             |
| <b>T37.8X2A</b> | POISONING BY OTHER SPECIFIED SYSTEMIC ANTI-INFECTIVES AND ANTIPARASITICS, INTENTIONAL SELF-HARM, INITIAL ENCOUNTER |
| <b>T38.0X2A</b> | POISONING BY GLUCOCORTICOIDS AND SYNTHETIC ANALOGUES, INTENTIONAL SELF-HARM, INITIAL ENCOUNTER                     |
| <b>T38.1X2A</b> | POISONING BY THYROID HORMONES AND SUBSTITUTES, INTENTIONAL SELF-HARM, INITIAL ENCOUNTER                            |
| <b>T38.2X2A</b> | POISONING BY ANTITHYROID DRUGS, INTENTIONAL SELF-HARM, INITIAL ENCOUNTER                                           |

|                 |                                                                                                                                   |
|-----------------|-----------------------------------------------------------------------------------------------------------------------------------|
| <b>T38.3X2A</b> | POISONING BY INSULIN AND ORAL HYPOGLYCEMIC [ANTIDIABETIC] DRUGS, INTENTIONAL SELF-HARM, INITIAL ENCOUNTER                         |
| <b>T38.4X2A</b> | POISONING BY ORAL CONTRACEPTIVES, INTENTIONAL SELF-HARM, INITIAL ENCOUNTER                                                        |
| <b>T38.5X2A</b> | POISONING BY OTHER ESTROGENS AND PROGESTOGENS, INTENTIONAL SELF-HARM, INITIAL ENCOUNTER                                           |
| <b>T38.6X2A</b> | POISONING BY ANTIGONADOTROPHINS, ANTIESTROGENS, ANTIANDROGENS, NOT ELSEWHERE CLASSIFIED, INTENTIONAL SELF-HARM, INITIAL ENCOUNTER |
| <b>T38.7X2A</b> | POISONING BY ANDROGENS AND ANABOLIC CONGENERES, INTENTIONAL SELF-HARM, INITIAL ENCOUNTER                                          |
| <b>T39.1X2A</b> | POISONING BY 4-AMINOPHENOL DERIVATIVES, INTENTIONAL SELF-HARM, INITIAL ENCOUNTER                                                  |
| <b>T39.2X2A</b> | POISONING BY PYRAZOLONE DERIVATIVES, INTENTIONAL SELF-HARM, INITIAL ENCOUNTER                                                     |
| <b>T39.4X2A</b> | POISONING BY ANTIRHEUMATICS, NOT ELSEWHERE CLASSIFIED, INTENTIONAL SELF-HARM, INITIAL ENCOUNTER                                   |
| <b>T39.8X2A</b> | POISONING BY OTHER NONOPIOID ANALGESICS AND ANTIPYRETICS, NOT ELSEWHERE CLASSIFIED, INTENTIONAL SELF-HARM, INITIAL ENCOUNTER      |
| <b>T40.0X2A</b> | POISONING BY OPIUM, INTENTIONAL SELF-HARM, INITIAL ENCOUNTER                                                                      |
| <b>T40.1X2A</b> | POISONING BY HEROIN, INTENTIONAL SELF-HARM, INITIAL ENCOUNTER                                                                     |
| <b>T40.2X2A</b> | POISONING BY OTHER OPIOIDS, INTENTIONAL SELF-HARM, INITIAL ENCOUNTER                                                              |
| <b>T40.3X2A</b> | POISONING BY METHADONE, INTENTIONAL SELF-HARM, INITIAL ENCOUNTER                                                                  |
| <b>T40.4X2A</b> | POISONING BY OTHER SYNTHETIC NARCOTICS, INTENTIONAL SELF-HARM, INITIAL ENCOUNTER                                                  |
| <b>T40.5X2A</b> | POISONING BY COCAINE, INTENTIONAL SELF-HARM, INITIAL ENCOUNTER                                                                    |
| <b>T40.7X2A</b> | POISONING BY CANNABIS (DERIVATIVES), INTENTIONAL SELF-HARM, INITIAL ENCOUNTER                                                     |
| <b>T40.8X2A</b> | POISONING BY LYSERGIDE [LSD], INTENTIONAL SELF-HARM, INITIAL ENCOUNTER                                                            |
| <b>T41.0X2A</b> | POISONING BY INHALED ANESTHETICS, INTENTIONAL SELF-HARM, INITIAL ENCOUNTER                                                        |

|                 |                                                                                                                         |
|-----------------|-------------------------------------------------------------------------------------------------------------------------|
| <b>T41.1X2A</b> | POISONING BY INTRAVENOUS ANESTHETICS, INTENTIONAL SELF-HARM, INITIAL ENCOUNTER                                          |
| <b>T41.3X2A</b> | POISONING BY LOCAL ANESTHETICS, INTENTIONAL SELF-HARM, INITIAL ENCOUNTER                                                |
| <b>T41.5X2A</b> | POISONING BY THERAPEUTIC GASES, INTENTIONAL SELF-HARM, INITIAL ENCOUNTER                                                |
| <b>T42.0X2A</b> | POISONING BY HYDANTOIN DERIVATIVES, INTENTIONAL SELF-HARM, INITIAL ENCOUNTER                                            |
| <b>T42.1X2A</b> | POISONING BY IMINOSTILBENES, INTENTIONAL SELF-HARM, INITIAL ENCOUNTER                                                   |
| <b>T42.2X2A</b> | POISONING BY SUCCINIMIDES AND OXAZOLIDINEDIONES, INTENTIONAL SELF-HARM, INITIAL ENCOUNTER                               |
| <b>T42.3X2A</b> | POISONING BY BARBITURATES, INTENTIONAL SELF-HARM, INITIAL ENCOUNTER                                                     |
| <b>T42.4X2A</b> | POISONING BY BENZODIAZEPINES, INTENTIONAL SELF-HARM, INITIAL ENCOUNTER                                                  |
| <b>T42.5X2A</b> | POISONING BY MIXED ANTIEPILEPTICS, INTENTIONAL SELF-HARM, INITIAL ENCOUNTER                                             |
| <b>T42.6X2A</b> | POISONING BY OTHER ANTIEPILEPTIC AND SEDATIVE-HYPNOTIC DRUGS, INTENTIONAL SELF-HARM, INITIAL ENCOUNTER                  |
| <b>T42.8X2A</b> | POISONING BY ANTIPARKINSONISM DRUGS AND OTHER CENTRAL MUSCLE-TONE DEPRESSANTS, INTENTIONAL SELF-HARM, INITIAL ENCOUNTER |
| <b>T43.1X2A</b> | POISONING BY MONOAMINE-OXIDASE-INHIBITOR ANTIDEPRESSANTS, INTENTIONAL SELF-HARM, INITIAL ENCOUNTER                      |
| <b>T43.3X2A</b> | POISONING BY PHENOTHIAZINE ANTIPSYCHOTICS AND NEUROLEPTICS, INTENTIONAL SELF-HARM, INITIAL ENCOUNTER                    |
| <b>T43.4X2A</b> | POISONING BY BUTYROPHENONE AND THIOTHIXENE NEUROLEPTICS, INTENTIONAL SELF-HARM, INITIAL ENCOUNTER                       |
| <b>T43.8X2A</b> | POISONING BY OTHER PSYCHOTROPIC DRUGS, INTENTIONAL SELF-HARM, INITIAL ENCOUNTER                                         |
| <b>T44.0X2A</b> | POISONING BY ANTICHOLINESTERASE AGENTS, INTENTIONAL SELF-HARM, INITIAL ENCOUNTER                                        |
| <b>T44.1X2A</b> | POISONING BY OTHER PARASYMPATHOMIMETICS [CHOLINERGICS], INTENTIONAL SELF-HARM, INITIAL ENCOUNTER                        |

|                 |                                                                                                                                         |
|-----------------|-----------------------------------------------------------------------------------------------------------------------------------------|
| <b>T44.2X2A</b> | POISONING BY GANGLIONIC BLOCKING DRUGS, INTENTIONAL SELF-HARM, INITIAL ENCOUNTER                                                        |
| <b>T44.3X2A</b> | POISONING BY OTHER PARASYMPATHOLYTICS [ANTICHOLINERGICS AND ANTIMUSCARINICS] AND SPASMOLYTICS, INTENTIONAL SELF-HARM, INITIAL ENCOUNTER |
| <b>T44.4X2A</b> | POISONING BY PREDOMINANTLY ALPHA-ADRENORECEPTOR AGONISTS, INTENTIONAL SELF-HARM, INITIAL ENCOUNTER                                      |
| <b>T44.5X2A</b> | POISONING BY PREDOMINANTLY BETA-ADRENORECEPTOR AGONISTS, INTENTIONAL SELF-HARM, INITIAL ENCOUNTER                                       |
| <b>T44.6X2A</b> | POISONING BY ALPHA-ADRENORECEPTOR ANTAGONISTS, INTENTIONAL SELF-HARM, INITIAL ENCOUNTER                                                 |
| <b>T44.7X2A</b> | POISONING BY BETA-ADRENORECEPTOR ANTAGONISTS, INTENTIONAL SELF-HARM, INITIAL ENCOUNTER                                                  |
| <b>T44.8X2A</b> | POISONING BY CENTRALLY-ACTING AND ADRENERGIC-NEURON-BLOCKING AGENTS, INTENTIONAL SELF-HARM, INITIAL ENCOUNTER                           |
| <b>T45.0X2A</b> | POISONING BY ANTIALLERGIC AND ANTIEMETIC DRUGS, INTENTIONAL SELF-HARM, INITIAL ENCOUNTER                                                |
| <b>T45.1X2A</b> | POISONING BY ANTINEOPLASTIC AND IMMUNOSUPPRESSIVE DRUGS, INTENTIONAL SELF-HARM, INITIAL ENCOUNTER                                       |
| <b>T45.2X2A</b> | POISONING BY VITAMINS, INTENTIONAL SELF-HARM, INITIAL ENCOUNTER                                                                         |
| <b>T45.3X2A</b> | POISONING BY ENZYMES, INTENTIONAL SELF-HARM, INITIAL ENCOUNTER                                                                          |
| <b>T45.4X2A</b> | POISONING BY IRON AND ITS COMPOUNDS, INTENTIONAL SELF-HARM, INITIAL ENCOUNTER                                                           |
| <b>T45.7X2A</b> | POISONING BY ANTICOAGULANT ANTAGONISTS, VITAMIN K AND OTHER COAGULANTS, INTENTIONAL SELF-HARM, INITIAL ENCOUNTER                        |
| <b>T45.8X2A</b> | POISONING BY OTHER PRIMARILY SYSTEMIC AND HEMATOLOGICAL AGENTS, INTENTIONAL SELF-HARM, INITIAL ENCOUNTER                                |
| <b>T46.0X2A</b> | POISONING BY CARDIAC-STIMULANT GLYCOSIDES AND DRUGS OF SIMILAR ACTION, INTENTIONAL SELF-HARM, INITIAL ENCOUNTER                         |
| <b>T46.1X2A</b> | POISONING BY CALCIUM-CHANNEL BLOCKERS, INTENTIONAL SELF-HARM, INITIAL ENCOUNTER                                                         |
| <b>T46.2X2A</b> | POISONING BY OTHER ANTIDYSRHYTHMIC DRUGS, INTENTIONAL SELF-HARM, INITIAL ENCOUNTER                                                      |

|                 |                                                                                                                  |
|-----------------|------------------------------------------------------------------------------------------------------------------|
| <b>T46.3X2A</b> | POISONING BY CORONARY VASODILATORS, INTENTIONAL SELF-HARM, INITIAL ENCOUNTER                                     |
| <b>T46.4X2A</b> | POISONING BY ANGIOTENSIN-CONVERTING-ENZYME INHIBITORS, INTENTIONAL SELF-HARM, INITIAL ENCOUNTER                  |
| <b>T46.5X2A</b> | POISONING BY OTHER ANTIHYPERTENSIVE DRUGS, INTENTIONAL SELF-HARM, INITIAL ENCOUNTER                              |
| <b>T46.6X2A</b> | POISONING BY ANTIHYPERLIPIDEMIC AND ANTIARTERIOSCLEROTIC DRUGS, INTENTIONAL SELF-HARM, INITIAL ENCOUNTER         |
| <b>T46.7X2A</b> | POISONING BY PERIPHERAL VASODILATORS, INTENTIONAL SELF-HARM, INITIAL ENCOUNTER                                   |
| <b>T46.8X2A</b> | POISONING BY ANTIVARICOSE DRUGS, INCLUDING SCLEROSING AGENTS, INTENTIONAL SELF-HARM, INITIAL ENCOUNTER           |
| <b>T47.0X2A</b> | POISONING BY HISTAMINE H2-RECEPTOR BLOCKERS, INTENTIONAL SELF-HARM, INITIAL ENCOUNTER                            |
| <b>T47.1X2A</b> | POISONING BY OTHER ANTACIDS AND ANTI-GASTRIC-SECRETION DRUGS, INTENTIONAL SELF-HARM, INITIAL ENCOUNTER           |
| <b>T47.2X2A</b> | POISONING BY STIMULANT LAXATIVES, INTENTIONAL SELF-HARM, INITIAL ENCOUNTER                                       |
| <b>T47.3X2A</b> | POISONING BY SALINE AND OSMOTIC LAXATIVES, INTENTIONAL SELF-HARM, INITIAL ENCOUNTER                              |
| <b>T47.4X2A</b> | POISONING BY OTHER LAXATIVES, INTENTIONAL SELF-HARM, INITIAL ENCOUNTER                                           |
| <b>T47.5X2A</b> | POISONING BY DIGESTANTS, INTENTIONAL SELF-HARM, INITIAL ENCOUNTER                                                |
| <b>T47.6X2A</b> | POISONING BY ANTIDIARRHEAL DRUGS, INTENTIONAL SELF-HARM, INITIAL ENCOUNTER                                       |
| <b>T47.7X2A</b> | POISONING BY EMETICS, INTENTIONAL SELF-HARM, INITIAL ENCOUNTER                                                   |
| <b>T47.8X2A</b> | POISONING BY OTHER AGENTS PRIMARILY AFFECTING GASTROINTESTINAL SYSTEM, INTENTIONAL SELF-HARM, INITIAL ENCOUNTER  |
| <b>T48.0X2A</b> | POISONING BY OXYTOCIC DRUGS, INTENTIONAL SELF-HARM, INITIAL ENCOUNTER                                            |
| <b>T48.1X2A</b> | POISONING BY SKELETAL MUSCLE RELAXANTS [NEUROMUSCULAR BLOCKING AGENTS], INTENTIONAL SELF-HARM, INITIAL ENCOUNTER |
| <b>T48.3X2A</b> | POISONING BY ANTITUSSIVES, INTENTIONAL SELF-HARM, INITIAL ENCOUNTER                                              |

|                 |                                                                                                                                      |
|-----------------|--------------------------------------------------------------------------------------------------------------------------------------|
| <b>T48.4X2A</b> | POISONING BY EXPECTORANTS, INTENTIONAL SELF-HARM, INITIAL ENCOUNTER                                                                  |
| <b>T48.5X2A</b> | POISONING BY OTHER ANTI-COMMON-COLD DRUGS, INTENTIONAL SELF-HARM, INITIAL ENCOUNTER                                                  |
| <b>T48.6X2A</b> | POISONING BY ANTI-ASTHMATICS, INTENTIONAL SELF-HARM, INITIAL ENCOUNTER                                                               |
| <b>T49.0X2A</b> | POISONING BY LOCAL ANTIFUNGAL, ANTI-INFECTIVE AND ANTI-INFLAMMATORY DRUGS, INTENTIONAL SELF-HARM, INITIAL ENCOUNTER                  |
| <b>T49.1X2A</b> | POISONING BY ANTIPRURITICS, INTENTIONAL SELF-HARM, INITIAL ENCOUNTER                                                                 |
| <b>T49.2X2A</b> | POISONING BY LOCAL ASTRINGENTS AND LOCAL DETERGENTS, INTENTIONAL SELF-HARM, INITIAL ENCOUNTER                                        |
| <b>T49.3X2A</b> | POISONING BY EMOLLIENTS, DEMULCENTS AND PROTECTANTS, INTENTIONAL SELF-HARM, INITIAL ENCOUNTER                                        |
| <b>T49.4X2A</b> | POISONING BY KERATOLYTICS, KERATOPLASTICS, AND OTHER HAIR TREATMENT DRUGS AND PREPARATIONS, INTENTIONAL SELF-HARM, INITIAL ENCOUNTER |
| <b>T49.5X2A</b> | POISONING BY OPHTHALMOLOGICAL DRUGS AND PREPARATIONS, INTENTIONAL SELF-HARM, INITIAL ENCOUNTER                                       |
| <b>T49.6X2A</b> | POISONING BY OTORHINOLARYNGOLOGICAL DRUGS AND PREPARATIONS, INTENTIONAL SELF-HARM, INITIAL ENCOUNTER                                 |
| <b>T49.7X2A</b> | POISONING BY DENTAL DRUGS, TOPICALLY APPLIED, INTENTIONAL SELF-HARM, INITIAL ENCOUNTER                                               |
| <b>T49.8X2A</b> | POISONING BY OTHER TOPICAL AGENTS, INTENTIONAL SELF-HARM, INITIAL ENCOUNTER                                                          |
| <b>T50.0X2A</b> | POISONING BY MINERALOCORTICOIDS AND THEIR ANTAGONISTS, INTENTIONAL SELF-HARM, INITIAL ENCOUNTER                                      |
| <b>T50.1X2A</b> | POISONING BY LOOP [HIGH-CEILING] DIURETICS, INTENTIONAL SELF-HARM, INITIAL ENCOUNTER                                                 |
| <b>T50.2X2A</b> | POISONING BY CARBONIC-ANHYDRASE INHIBITORS, BENZOTHIADIAZIDES AND OTHER DIURETICS, INTENTIONAL SELF-HARM, INITIAL ENCOUNTER          |
| <b>T50.3X2A</b> | POISONING BY ELECTROLYTIC, CALORIC AND WATER-BALANCE AGENTS, INTENTIONAL SELF-HARM, INITIAL ENCOUNTER                                |
| <b>T50.4X2A</b> | POISONING BY DRUGS AFFECTING URIC ACID METABOLISM, INTENTIONAL SELF-HARM, INITIAL ENCOUNTER                                          |

|                 |                                                                                                   |
|-----------------|---------------------------------------------------------------------------------------------------|
| <b>T50.5X2A</b> | POISONING BY APPETITE DEPRESSANTS, INTENTIONAL SELF-HARM, INITIAL ENCOUNTER                       |
| <b>T50.6X2A</b> | POISONING BY ANTIDOTES AND CHELATING AGENTS, INTENTIONAL SELF-HARM, INITIAL ENCOUNTER             |
| <b>T50.7X2A</b> | POISONING BY ANALEPTICS AND OPIOID RECEPTOR ANTAGONISTS, INTENTIONAL SELF-HARM, INITIAL ENCOUNTER |
| <b>T50.8X2A</b> | POISONING BY DIAGNOSTIC AGENTS, INTENTIONAL SELF-HARM, INITIAL ENCOUNTER                          |
| <b>T51.0X2A</b> | TOXIC EFFECT OF ETHANOL, INTENTIONAL SELF-HARM, INITIAL ENCOUNTER                                 |
| <b>T51.1X2A</b> | TOXIC EFFECT OF METHANOL, INTENTIONAL SELF-HARM, INITIAL ENCOUNTER                                |
| <b>T51.2X2A</b> | TOXIC EFFECT OF 2-PROPANOL, INTENTIONAL SELF-HARM, INITIAL ENCOUNTER                              |
| <b>T51.3X2A</b> | TOXIC EFFECT OF FUSEL OIL, INTENTIONAL SELF-HARM, INITIAL ENCOUNTER                               |
| <b>T51.8X2A</b> | TOXIC EFFECT OF OTHER ALCOHOLS, INTENTIONAL SELF-HARM, INITIAL ENCOUNTER                          |
| <b>T52.0X2A</b> | TOXIC EFFECT OF PETROLEUM PRODUCTS, INTENTIONAL SELF-HARM, INITIAL ENCOUNTER                      |
| <b>T52.1X2A</b> | TOXIC EFFECT OF BENZENE, INTENTIONAL SELF-HARM, INITIAL ENCOUNTER                                 |
| <b>T52.2X2A</b> | TOXIC EFFECT OF HOMOLOGUES OF BENZENE, INTENTIONAL SELF-HARM, INITIAL ENCOUNTER                   |
| <b>T52.3X2A</b> | TOXIC EFFECT OF GLYCOLS, INTENTIONAL SELF-HARM, INITIAL ENCOUNTER                                 |
| <b>T52.4X2A</b> | TOXIC EFFECT OF KETONES, INTENTIONAL SELF-HARM, INITIAL ENCOUNTER                                 |
| <b>T52.8X2A</b> | TOXIC EFFECT OF OTHER ORGANIC SOLVENTS, INTENTIONAL SELF-HARM, INITIAL ENCOUNTER                  |
| <b>T53.0X2A</b> | TOXIC EFFECT OF CARBON TETRACHLORIDE, INTENTIONAL SELF-HARM, INITIAL ENCOUNTER                    |
| <b>T53.1X2A</b> | TOXIC EFFECT OF CHLOROFORM, INTENTIONAL SELF-HARM, INITIAL ENCOUNTER                              |
| <b>T53.2X2A</b> | TOXIC EFFECT OF TRICHLOROETHYLENE, INTENTIONAL SELF-HARM, INITIAL ENCOUNTER                       |
| <b>T53.3X2A</b> | TOXIC EFFECT OF TETRACHLOROETHYLENE, INTENTIONAL SELF-HARM, INITIAL ENCOUNTER                     |

|                 |                                                                                                               |
|-----------------|---------------------------------------------------------------------------------------------------------------|
| <b>T53.4X2A</b> | TOXIC EFFECT OF DICHLOROMETHANE, INTENTIONAL SELF-HARM, INITIAL ENCOUNTER                                     |
| <b>T53.5X2A</b> | TOXIC EFFECT OF CHLOROFLUOROCARBONS, INTENTIONAL SELF-HARM, INITIAL ENCOUNTER                                 |
| <b>T53.6X2A</b> | TOXIC EFFECT OF OTHER HALOGEN DERIVATIVES OF ALIPHATIC HYDROCARBONS, INTENTIONAL SELF-HARM, INITIAL ENCOUNTER |
| <b>T53.7X2A</b> | TOXIC EFFECT OF OTHER HALOGEN DERIVATIVES OF AROMATIC HYDROCARBONS, INTENTIONAL SELF-HARM, INITIAL ENCOUNTER  |
| <b>T54.0X2A</b> | TOXIC EFFECT OF PHENOL AND PHENOL HOMOLOGUES, INTENTIONAL SELF-HARM, INITIAL ENCOUNTER                        |
| <b>T54.1X2A</b> | TOXIC EFFECT OF OTHER CORROSIVE ORGANIC COMPOUNDS, INTENTIONAL SELF-HARM, INITIAL ENCOUNTER                   |
| <b>T54.2X2A</b> | TOXIC EFFECT OF CORROSIVE ACIDS AND ACID-LIKE SUBSTANCES, INTENTIONAL SELF-HARM, INITIAL ENCOUNTER            |
| <b>T54.3X2A</b> | TOXIC EFFECT OF CORROSIVE ALKALIS AND ALKALI-LIKE SUBSTANCES, INTENTIONAL SELF-HARM, INITIAL ENCOUNTER        |
| <b>T55.0X2A</b> | TOXIC EFFECT OF SOAPS, INTENTIONAL SELF-HARM, INITIAL ENCOUNTER                                               |
| <b>T55.1X2A</b> | TOXIC EFFECT OF DETERGENTS, INTENTIONAL SELF-HARM, INITIAL ENCOUNTER                                          |
| <b>T56.0X2A</b> | TOXIC EFFECT OF LEAD AND ITS COMPOUNDS, INTENTIONAL SELF-HARM, INITIAL ENCOUNTER                              |
| <b>T56.1X2A</b> | TOXIC EFFECT OF MERCURY AND ITS COMPOUNDS, INTENTIONAL SELF-HARM, INITIAL ENCOUNTER                           |
| <b>T56.2X2A</b> | TOXIC EFFECT OF CHROMIUM AND ITS COMPOUNDS, INTENTIONAL SELF-HARM, INITIAL ENCOUNTER                          |
| <b>T56.3X2A</b> | TOXIC EFFECT OF CADMIUM AND ITS COMPOUNDS, INTENTIONAL SELF-HARM, INITIAL ENCOUNTER                           |
| <b>T56.4X2A</b> | TOXIC EFFECT OF COPPER AND ITS COMPOUNDS, INTENTIONAL SELF-HARM, INITIAL ENCOUNTER                            |
| <b>T56.5X2A</b> | TOXIC EFFECT OF ZINC AND ITS COMPOUNDS, INTENTIONAL SELF-HARM, INITIAL ENCOUNTER                              |
| <b>T56.6X2A</b> | TOXIC EFFECT OF TIN AND ITS COMPOUNDS, INTENTIONAL SELF-HARM, INITIAL ENCOUNTER                               |



|                 |                                                                                                                              |
|-----------------|------------------------------------------------------------------------------------------------------------------------------|
| <b>T56.7X2A</b> | TOXIC EFFECT OF BERYLLIUM AND ITS COMPOUNDS, INTENTIONAL SELF-HARM, INITIAL ENCOUNTER                                        |
| <b>T57.0X2A</b> | TOXIC EFFECT OF ARSENIC AND ITS COMPOUNDS, INTENTIONAL SELF-HARM, INITIAL ENCOUNTER                                          |
| <b>T57.1X2A</b> | TOXIC EFFECT OF PHOSPHORUS AND ITS COMPOUNDS, INTENTIONAL SELF-HARM, INITIAL ENCOUNTER                                       |
| <b>T57.2X2A</b> | TOXIC EFFECT OF MANGANESE AND ITS COMPOUNDS, INTENTIONAL SELF-HARM, INITIAL ENCOUNTER                                        |
| <b>T57.3X2A</b> | TOXIC EFFECT OF HYDROGEN CYANIDE, INTENTIONAL SELF-HARM, INITIAL ENCOUNTER                                                   |
| <b>T57.8X2A</b> | TOXIC EFFECT OF OTHER SPECIFIED INORGANIC SUBSTANCES, INTENTIONAL SELF-HARM, INITIAL ENCOUNTER                               |
| <b>T58.2X2A</b> | TOXIC EFFECT OF CARBON MONOXIDE FROM INCOMPLETE COMBUSTION OF OTHER DOMESTIC FUELS, INTENTIONAL SELF-HARM, INITIAL ENCOUNTER |
| <b>T58.8X2A</b> | TOXIC EFFECT OF CARBON MONOXIDE FROM OTHER SOURCE, INTENTIONAL SELF-HARM, INITIAL ENCOUNTER                                  |
| <b>T59.0X2A</b> | TOXIC EFFECT OF NITROGEN OXIDES, INTENTIONAL SELF-HARM, INITIAL ENCOUNTER                                                    |
| <b>T59.1X2A</b> | TOXIC EFFECT OF SULFUR DIOXIDE, INTENTIONAL SELF-HARM, INITIAL ENCOUNTER                                                     |
| <b>T59.2X2A</b> | TOXIC EFFECT OF FORMALDEHYDE, INTENTIONAL SELF-HARM, INITIAL ENCOUNTER                                                       |
| <b>T59.3X2A</b> | TOXIC EFFECT OF LACRIMOGENIC GAS, INTENTIONAL SELF-HARM, INITIAL ENCOUNTER                                                   |
| <b>T59.4X2A</b> | TOXIC EFFECT OF CHLORINE GAS, INTENTIONAL SELF-HARM, INITIAL ENCOUNTER                                                       |
| <b>T59.5X2A</b> | TOXIC EFFECT OF FLUORINE GAS AND HYDROGEN FLUORIDE, INTENTIONAL SELF-HARM, INITIAL ENCOUNTER                                 |
| <b>T59.6X2A</b> | TOXIC EFFECT OF HYDROGEN SULFIDE, INTENTIONAL SELF-HARM, INITIAL ENCOUNTER                                                   |
| <b>T59.7X2A</b> | TOXIC EFFECT OF CARBON DIOXIDE, INTENTIONAL SELF-HARM, INITIAL ENCOUNTER                                                     |
| <b>T60.0X2A</b> | TOXIC EFFECT OF ORGANOPHOSPHATE AND CARBAMATE INSECTICIDES, INTENTIONAL SELF-HARM, INITIAL ENCOUNTER                         |

|                 |                                                                                                                               |
|-----------------|-------------------------------------------------------------------------------------------------------------------------------|
| <b>T60.1X2A</b> | TOXIC EFFECT OF HALOGENATED INSECTICIDES, INTENTIONAL SELF-HARM, INITIAL ENCOUNTER                                            |
| <b>T60.2X2A</b> | TOXIC EFFECT OF OTHER INSECTICIDES, INTENTIONAL SELF-HARM, INITIAL ENCOUNTER                                                  |
| <b>T60.3X2A</b> | TOXIC EFFECT OF HERBICIDES AND FUNGICIDES, INTENTIONAL SELF-HARM, INITIAL ENCOUNTER                                           |
| <b>T60.4X2A</b> | TOXIC EFFECT OF RODENTICIDES, INTENTIONAL SELF-HARM, INITIAL ENCOUNTER                                                        |
| <b>T60.8X2A</b> | TOXIC EFFECT OF OTHER PESTICIDES, INTENTIONAL SELF-HARM, INITIAL ENCOUNTER                                                    |
| <b>T61.8X2A</b> | TOXIC EFFECT OF OTHER SEAFOOD, INTENTIONAL SELF-HARM, INITIAL ENCOUNTER                                                       |
| <b>T62.0X2A</b> | TOXIC EFFECT OF INGESTED MUSHROOMS, INTENTIONAL SELF-HARM, INITIAL ENCOUNTER                                                  |
| <b>T62.1X2A</b> | TOXIC EFFECT OF INGESTED BERRIES, INTENTIONAL SELF-HARM, INITIAL ENCOUNTER                                                    |
| <b>T62.2X2A</b> | TOXIC EFFECT OF OTHER INGESTED (PARTS OF) PLANT(S), INTENTIONAL SELF-HARM, INITIAL ENCOUNTER                                  |
| <b>T62.8X2A</b> | TOXIC EFFECT OF OTHER SPECIFIED NOXIOUS SUBSTANCES EATEN AS FOOD, INTENTIONAL SELF-HARM, INITIAL ENCOUNTER                    |
| <b>T63.2X2A</b> | TOXIC EFFECT OF VENOM OF SCORPION, INTENTIONAL SELF-HARM, INITIAL ENCOUNTER                                                   |
| <b>T65.0X2A</b> | TOXIC EFFECT OF CYANIDES, INTENTIONAL SELF-HARM, INITIAL ENCOUNTER                                                            |
| <b>T65.1X2A</b> | TOXIC EFFECT OF STRYCHNINE AND ITS SALTS, INTENTIONAL SELF-HARM, INITIAL ENCOUNTER                                            |
| <b>T65.3X2A</b> | TOXIC EFFECT OF NITRODERIVATIVES AND AMINODERIVATIVES OF BENZENE AND ITS HOMOLOGUES, INTENTIONAL SELF-HARM, INITIAL ENCOUNTER |
| <b>T65.4X2A</b> | TOXIC EFFECT OF CARBON DISULFIDE, INTENTIONAL SELF-HARM, INITIAL ENCOUNTER                                                    |
| <b>T65.5X2A</b> | TOXIC EFFECT OF NITROGLYCERIN AND OTHER NITRIC ACIDS AND ESTERS, INTENTIONAL SELF-HARM, INITIAL ENCOUNTER                     |
| <b>T65.6X2A</b> | TOXIC EFFECT OF PAINTS AND DYES, NOT ELSEWHERE CLASSIFIED, INTENTIONAL SELF-HARM, INITIAL ENCOUNTER                           |

*ICD-10 diagnosis codes indicating external causes of injury when involving intentional self-harm:*

| <b>ICD 10<br/>Diagnosis<br/>Code</b> | <b>Code Description</b>                                                                                          |
|--------------------------------------|------------------------------------------------------------------------------------------------------------------|
| <b>T71.112A</b>                      | ASPHYXIATION DUE TO SMOTHERING UNDER PILLOW, INTENTIONAL SELF-HARM, INITIAL ENCOUNTER                            |
| <b>T71.122A</b>                      | ASPHYXIATION DUE TO PLASTIC BAG, INTENTIONAL SELF-HARM, INITIAL ENCOUNTER                                        |
| <b>T71.132A</b>                      | ASPHYXIATION DUE TO BEING TRAPPED IN BED LINENS, INTENTIONAL SELF-HARM, INITIAL ENCOUNTER                        |
| <b>T71.152A</b>                      | ASPHYXIATION DUE TO SMOTHERING IN FURNITURE, INTENTIONAL SELF-HARM, INITIAL ENCOUNTER                            |
| <b>T71.162A</b>                      | ASPHYXIATION DUE TO HANGING, INTENTIONAL SELF-HARM, INITIAL ENCOUNTER                                            |
| <b>T71.192A</b>                      | ASPHYXIATION DUE TO MECHANICAL THREAT TO BREATHING DUE TO OTHER CAUSES, INTENTIONAL SELF-HARM, INITIAL ENCOUNTER |
| <b>X71.0XXA</b>                      | INTENTIONAL SELF-HARM BY DROWNING AND SUBMERSION WHILE IN BATHTUB, INITIAL ENCOUNTER                             |
| <b>X71.1XXA</b>                      | INTENTIONAL SELF-HARM BY DROWNING AND SUBMERSION WHILE IN SWIMMING POOL, INITIAL ENCOUNTER                       |
| <b>X71.2XXA</b>                      | INTENTIONAL SELF-HARM BY DROWNING AND SUBMERSION AFTER JUMP INTO SWIMMING POOL, INITIAL ENCOUNTER                |
| <b>X71.3XXA</b>                      | INTENTIONAL SELF-HARM BY DROWNING AND SUBMERSION IN NATURAL WATER, INITIAL ENCOUNTER                             |
| <b>X71.8XXA</b>                      | OTHER INTENTIONAL SELF-HARM BY DROWNING AND SUBMERSION, INITIAL ENCOUNTER                                        |
| <b>X71.9XXA</b>                      | INTENTIONAL SELF-HARM BY DROWNING AND SUBMERSION, UNSPECIFIED, INITIAL ENCOUNTER                                 |

|                 |                                                                                   |
|-----------------|-----------------------------------------------------------------------------------|
| <b>X72.XXXA</b> | INTENTIONAL SELF-HARM BY HANDGUN DISCHARGE, INITIAL ENCOUNTER                     |
| <b>X73.0XXA</b> | INTENTIONAL SELF-HARM BY SHOTGUN DISCHARGE, INITIAL ENCOUNTER                     |
| <b>X73.1XXA</b> | INTENTIONAL SELF-HARM BY HUNTING RIFLE DISCHARGE, INITIAL ENCOUNTER               |
| <b>X73.2XXA</b> | INTENTIONAL SELF-HARM BY MACHINE GUN DISCHARGE, INITIAL ENCOUNTER                 |
| <b>X73.8XXA</b> | INTENTIONAL SELF-HARM BY OTHER LARGER FIREARM DISCHARGE, INITIAL ENCOUNTER        |
| <b>X73.9XXA</b> | INTENTIONAL SELF-HARM BY UNSPECIFIED LARGER FIREARM DISCHARGE, INITIAL ENCOUNTER  |
| <b>X74.01XA</b> | INTENTIONAL SELF-HARM BY AIRGUN, INITIAL ENCOUNTER                                |
| <b>X74.02XA</b> | INTENTIONAL SELF-HARM BY PAINTBALL GUN, INITIAL ENCOUNTER                         |
| <b>X74.09XA</b> | INTENTIONAL SELF-HARM BY OTHER GAS, AIR OR SPRING-OPERATED GUN, INITIAL ENCOUNTER |
| <b>X74.8XXA</b> | INTENTIONAL SELF-HARM BY OTHER FIREARM DISCHARGE, INITIAL ENCOUNTER               |
| <b>X74.9XXA</b> | INTENTIONAL SELF-HARM BY UNSPECIFIED FIREARM DISCHARGE, INITIAL ENCOUNTER         |
| <b>X75.XXXA</b> | INTENTIONAL SELF-HARM BY EXPLOSIVE MATERIAL, INITIAL ENCOUNTER                    |
| <b>X76.XXXA</b> | INTENTIONAL SELF-HARM BY SMOKE, FIRE AND FLAMES, INITIAL ENCOUNTER                |
| <b>X77.0XXA</b> | INTENTIONAL SELF-HARM BY STEAM OR HOT VAPORS, INITIAL ENCOUNTER                   |
| <b>X77.1XXA</b> | INTENTIONAL SELF-HARM BY HOT TAP WATER, INITIAL ENCOUNTER                         |
| <b>X77.2XXA</b> | INTENTIONAL SELF-HARM BY OTHER HOT FLUIDS, INITIAL ENCOUNTER                      |
| <b>X77.3XXA</b> | INTENTIONAL SELF-HARM BY HOT HOUSEHOLD APPLIANCES, INITIAL ENCOUNTER              |
| <b>X77.8XXA</b> | INTENTIONAL SELF-HARM BY OTHER HOT OBJECTS, INITIAL ENCOUNTER                     |
| <b>X77.9XXA</b> | INTENTIONAL SELF-HARM BY UNSPECIFIED HOT OBJECTS, INITIAL ENCOUNTER               |
| <b>X78.0XXA</b> | INTENTIONAL SELF-HARM BY SHARP GLASS, INITIAL ENCOUNTER                           |
| <b>X78.1XXA</b> | INTENTIONAL SELF-HARM BY KNIFE, INITIAL ENCOUNTER                                 |

|                 |                                                                                              |
|-----------------|----------------------------------------------------------------------------------------------|
| <b>X78.2XXA</b> | INTENTIONAL SELF-HARM BY SWORD OR DAGGER, INITIAL ENCOUNTER                                  |
| <b>X78.8XXA</b> | INTENTIONAL SELF-HARM BY OTHER SHARP OBJECT, INITIAL ENCOUNTER                               |
| <b>X78.9XXA</b> | INTENTIONAL SELF-HARM BY UNSPECIFIED SHARP OBJECT, INITIAL ENCOUNTER                         |
| <b>X79.XXXA</b> | INTENTIONAL SELF-HARM BY BLUNT OBJECT, INITIAL ENCOUNTER                                     |
| <b>X80.XXXA</b> | INTENTIONAL SELF-HARM BY JUMPING FROM A HIGH PLACE, INITIAL ENCOUNTER                        |
| <b>X81.0XXA</b> | INTENTIONAL SELF-HARM BY JUMPING OR LYING IN FRONT OF MOTOR VEHICLE, INITIAL ENCOUNTER       |
| <b>X81.1XXA</b> | INTENTIONAL SELF-HARM BY JUMPING OR LYING IN FRONT OF (SUBWAY) TRAIN, INITIAL ENCOUNTER      |
| <b>X81.8XXA</b> | INTENTIONAL SELF-HARM BY JUMPING OR LYING IN FRONT OF OTHER MOVING OBJECT, INITIAL ENCOUNTER |
| <b>X82.0XXA</b> | INTENTIONAL COLLISION OF MOTOR VEHICLE WITH OTHER MOTOR VEHICLE, INITIAL ENCOUNTER           |
| <b>X82.1XXA</b> | INTENTIONAL COLLISION OF MOTOR VEHICLE WITH TRAIN, INITIAL ENCOUNTER                         |
| <b>X82.2XXA</b> | INTENTIONAL COLLISION OF MOTOR VEHICLE WITH TREE, INITIAL ENCOUNTER                          |
| <b>X82.8XXA</b> | OTHER INTENTIONAL SELF-HARM BY CRASHING OF MOTOR VEHICLE, INITIAL ENCOUNTER                  |
| <b>X83.0XXA</b> | INTENTIONAL SELF-HARM BY CRASHING OF AIRCRAFT, INITIAL ENCOUNTER                             |
| <b>X83.1XXA</b> | INTENTIONAL SELF-HARM BY ELECTROCUTION, INITIAL ENCOUNTER                                    |
| <b>X83.2XXA</b> | INTENTIONAL SELF-HARM BY EXPOSURE TO EXTREMES OF COLD, INITIAL ENCOUNTER                     |
| <b>X83.8XXA</b> | INTENTIONAL SELF-HARM BY OTHER SPECIFIED MEANS, INITIAL ENCOUNTER                            |

***Denominator Exclusion Criteria***

**Denominator Exclusion Criterion 1:** Veterans who expire during their inpatient or residential stay, or who expire within 30 days of their discharge date.

**Denominator Exclusion Criterion 2:** Veterans re-admitted to any inpatient or residential VA treating specialty (mental health and non-mental health) within 30 days of their discharge date that qualified initially. Discharges that are followed by re-admission within 30 days will not be excluded if the Numerator Inclusion Criteria is met prior to the date of re-admission.

**Denominator Exclusion Criterion 3:** Veterans with any of the following Discharged To Locations:

- 00 VA Hospital
- 01 Military Hospital
- 02 Other Fed Hospital
- 03 Other Government Hospital
- 04 Community Hospital
- 05 VA NHCU
- 07 Community Nursing Home
- 09 Same Community Nursing Home
- 10 Other Community Nursing Home
- 11 State Home Nursing Care
- 12 VA Domiciliary
- 13 State Home Domiciliary
- 19 Penal Institution

**Denominator Exclusion Criteria 4:** Veterans who are transferred to, discharged to, or admitted to hospice treating specialty, or to a Veterans State Home, within 30 days of discharge date.

### ***Numerator Inclusion Criteria***

Number of qualifying discharges in Groups 1 - 3 with the respective number of face-to-face, telehealth or telephone encounters in any primary or secondary 500-series mental health stop code within 30 days after the date of discharge:

- Group 1 discharges with 2 MH outpatient visits,
- Group 2 discharges with 3 MH outpatient visits,
- Group 3 discharges with 4 MH outpatient visits.

Stop codes 156 or 157 for Home Based Primary Care are included as a MH outpatient visit if they are listed in the primary or secondary position. Primary or secondary stop codes that indicate telephone encounters will only be included in the numerator if they are 11 minutes or longer, as indicated by attaching one of the following CPT codes to the encounter: 98967, 98968, 99442, or 99443. Visits must occur on different dates over the 30-day period, but there are no restrictions on when during the 30-day period these dates must occur (e.g., 3 visits on different dates to an IOP in a single week will count as 3 visits). Visits to non-Licensed Independent Providers are eligible as outpatient MH visits, if accompanied by a 500-series MH stop code.

\*MH outpatient visits on the same date as discharge will count only for discharges against medical advice (AMA) or coded as Irregular, as a MH visit is to be offered and, ideally, provided within 24 hours in this scenario. The observation period still extends to 30 days, starting after the date of discharge for AMA/Irregular discharges.

*500-Series Mental Health Stopcodes (the measure takes the range of 500-series codes, so additions/deletions to this list will not affect local performance assuming an addition is in the 500 range and another 500-series mental health stopcode is used in the case of deletions)*

| Stop Code Number | Secondary or Pair | Primary, Secondary, or Either | Stop Code Name                  |
|------------------|-------------------|-------------------------------|---------------------------------|
| 502              |                   | E                             | Mental Health Clinic Individual |
| 504              |                   | E                             | Grant and Per Diem- Group       |

|     |     |   |                                                                                          |
|-----|-----|---|------------------------------------------------------------------------------------------|
| 507 |     | E | HUD/VASH- Group                                                                          |
| 508 |     | E | HCHV/HCMI- Group                                                                         |
|     | 509 | S | Psychiatry                                                                               |
|     | 510 | S | Psychology                                                                               |
| 511 |     | E | Grant and Per Diem- Individual                                                           |
| 513 |     | E | Substance Use Disorder Individual                                                        |
|     | 514 | S | Substance Use Disorder - Home Visit                                                      |
| 516 |     | E | PTSD - Group                                                                             |
|     | 519 | S | Substance Use Disorder/PTSD Teams                                                        |
| 522 |     | E | Department of Housing and Urban Development (HUD)-VA Supported Housing (VASH) Individual |
| 523 |     | E | Opioid Substitution                                                                      |
| 524 |     | E | Active Duty Sexual Trauma                                                                |
| 525 |     | E | Women's Stress Disorder Treatment Teams                                                  |
| 527 |     | P | Telephone Mental Health                                                                  |
| 528 |     | P | Telephone/Homeless Chronically Mentally Ill (HCMI)                                       |
| 529 |     | E | HCHV/HCMI- Individual                                                                    |
| 530 |     | P | Telephone/HUD-VASH                                                                       |
| 533 |     | E | Mental Health Intervention Biomedical Care- Individual                                   |
| 534 |     | E | Mental Health Integrated Care - Individual                                               |
| 535 |     | E | Mental Health Vocational Assistance Individual                                           |
| 536 |     | P | Telephone Mental Health Vocational Assistance                                            |
| 538 |     | E | Psychological Testing                                                                    |
| 539 |     | P | MH Integrated Care Group                                                                 |
| 542 |     | P | Telephone PTSD                                                                           |
| 545 |     | P | Telephone Substance Use Disorder                                                         |
| 546 |     | P | Telephone Intensive Community Mental Health Recovery Services (ICMHR)                    |



|     |               |   |                                                                                            |
|-----|---------------|---|--------------------------------------------------------------------------------------------|
| 547 |               | E | Intensive Substance Use Disorder - Group                                                   |
| 548 |               | E | Intensive Substance Use Disorder - Individual                                              |
| 550 |               | E | Mental Health Clinic (Group)                                                               |
| 552 |               | P | Intensive Community Mental Health Recovery Services (ICMHR)- Individual                    |
| 555 |               | E | Homeless Veteran Community Employment Services- Individual                                 |
| 556 |               | E | Homeless Veteran Community Employment Services- Group                                      |
| 560 |               | E | Substance Use Disorder- Group                                                              |
| 562 |               | E | PTSD- Individual                                                                           |
| 564 |               | E | Mental Health Team Case Management                                                         |
| 565 |               | E | MH Intervention Biomedical Care- Group                                                     |
| 566 |               | E | Mental Health Risk-Factor Reduction Educational- Group                                     |
| 567 |               | P | Intensive Community Mental Health Recovery Services (ICMHR)- Group                         |
| 568 |               | E | Mental Health Compensated Work Therapy/Supported Employment (CWT/SE) Face-to-Face          |
|     | <b>568535</b> |   | Community-Based Employment Services (CBES)                                                 |
| 571 |               | E | SeRV-MH (Services for Returning Veterans-Mental Health)- Individual                        |
| 572 |               | P | SeRV-MH (Services for Returning Veterans-Mental Health)- Group                             |
| 573 |               | E | Mental Health Incentive Therapy Face-to-Face                                               |
| 574 |               | E | Mental Health Compensated Work Therapy/Transitional Work Experience (CWT/TWE) Face-to-Face |
| 575 |               | E | Mental Health Vocational Assistance- Group                                                 |
| 576 |               | P | Psycho-Geriatric Clinic- Individual                                                        |
| 577 |               | P | Psycho-Geriatric Clinic- Group                                                             |
| 579 |               | P | Telephone Psycho-Geriatrics                                                                |

|            |  |   |                                                                                     |
|------------|--|---|-------------------------------------------------------------------------------------|
| <b>582</b> |  | P | Psychosocial Rehabilitation Recovery Center (PRRC)-<br>Individual                   |
| <b>583</b> |  | P | Psychosocial Rehabilitation Recovery Center (PRRC)-<br>Group                        |
| <b>584</b> |  | P | Telephone Psychosocial Rehabilitation Recovery Center<br>(PRRC)                     |
| <b>586</b> |  | E | Residential Rehabilitation Treatment Program (RRTP)-<br>Individual                  |
| <b>587</b> |  | E | Residential Rehabilitation Treatment Program (RRTP)-<br>Group                       |
| <b>591</b> |  | E | Incarcerated Veterans Re-Entry                                                      |
| <b>592</b> |  | E | Veterans Justice Outreach                                                           |
| <b>593</b> |  | E | Residential Rehabilitation Treatment Program (RRTP)<br>Outreach Services            |
| <b>596</b> |  | E | Residential Rehabilitation Treatment Program (RRTP)<br>Admission Screening Services |
| <b>597</b> |  | P | Telephone/Residential Rehabilitation Treatment Program<br>(RRTP)                    |
| <b>598</b> |  | E | Residential Rehabilitation Treatment Program (RRTP)<br>Outpatient - Individual      |
| <b>599</b> |  | E | Residential Rehabilitation Treatment Program (RRTP)<br>Outpatient - Group           |

\*Encounters with secondary/credit stops 107, 115, 152, 311, 321, 328, 333, 334, 372, 373, 421, 430, 435, 444, 445, 446, 447, 448, 450, 474, 707, 708, 719, or 999 do NOT count as meeting this measure no matter what code is used in the primary stop position. Encounters that occur in stop codes 527, 528, 530, 536, 537, 542, 545, 546, 579, 584 and 597 only count if they are accompanied by the following CPT codes: 99442, 99443, 98967 and 98968:

| <b>CPT Code</b> | <b>Description</b>                                                                                                                                                              |
|-----------------|---------------------------------------------------------------------------------------------------------------------------------------------------------------------------------|
| <b>98967</b>    | TELEPHONE ASSESSMENT AND MANAGEMENT SERVICE PROVIDED BY A QUALIFIED NONPHYSICIAN HEALTH CARE PROFESSIONAL TO AN ESTABLISHED PATIENT, PARENT, OR GUARDIAN NOT ORIGINATING FROM A |

|              |                                                                                                                                                                                                                                                                                                                                                                                                                                           |
|--------------|-------------------------------------------------------------------------------------------------------------------------------------------------------------------------------------------------------------------------------------------------------------------------------------------------------------------------------------------------------------------------------------------------------------------------------------------|
|              | RELATED ASSESSMENT AND MANAGEMENT SERVICE PROVIDED WITHIN THE PREVIOUS 7 DAYS NOR LEADING TO AN ASSESSMENT AND MANAGEMENT SERVICE OR PROCEDURE WITHIN THE NEXT 24 HOURS OR SOONEST AVAILABLE APPOINTMENT; 11-20 MINUTES OF MEDICAL DISCUSSION                                                                                                                                                                                             |
| <b>98968</b> | TELEPHONE ASSESSMENT AND MANAGEMENT SERVICE PROVIDED BY A QUALIFIED NONPHYSICIAN HEALTH CARE PROFESSIONAL TO AN ESTABLISHED PATIENT, PARENT, OR GUARDIAN NOT ORIGINATING FROM A RELATED ASSESSMENT AND MANAGEMENT SERVICE PROVIDED WITHIN THE PREVIOUS 7 DAYS NOR LEADING TO AN ASSESSMENT AND MANAGEMENT SERVICE OR PROCEDURE WITHIN THE NEXT 24 HOURS OR SOONEST AVAILABLE APPOINTMENT; 21-30 MINUTES OF MEDICAL DISCUSSION             |
| <b>99442</b> | TELEPHONE EVALUATION AND MANAGEMENT SERVICE BY A PHYSICIAN OR OTHER QUALIFIED HEALTH CARE PROFESSIONAL WHO MAY REPORT EVALUATION AND MANAGEMENT SERVICES PROVIDED TO AN ESTABLISHED PATIENT, PARENT, OR GUARDIAN NOT ORIGINATING FROM A RELATED E/M SERVICE PROVIDED WITHIN THE PREVIOUS 7 DAYS NOR LEADING TO AN E/M SERVICE OR PROCEDURE WITHIN THE NEXT 24 HOURS OR SOONEST AVAILABLE APPOINTMENT; 11-20 MINUTES OF MEDICAL DISCUSSION |
| <b>99443</b> | TELEPHONE EVALUATION AND MANAGEMENT SERVICE BY A PHYSICIAN OR OTHER QUALIFIED HEALTH CARE PROFESSIONAL WHO MAY REPORT EVALUATION AND MANAGEMENT SERVICES PROVIDED TO AN ESTABLISHED PATIENT, PARENT, OR GUARDIAN NOT ORIGINATING FROM A RELATED E/M SERVICE PROVIDED WITHIN THE PREVIOUS 7 DAYS NOR LEADING TO AN E/M SERVICE OR PROCEDURE WITHIN THE NEXT 24 HOURS OR SOONEST AVAILABLE APPOINTMENT; 21-30 MINUTES OF MEDICAL DISCUSSION |

**Numerator Exclusion Criteria**

*No numerator exclusions are specified for PDE1 at this time. One implication is that visits no longer require personclass codes as previous follow up after discharge metrics did.*
